# Supplementary material for: Symptoms and risk factors for long COVID in non-hospitalized adults
Source: PubMed Central journal article supplement (PMC9388369; doi:10.1038/s41591-022-01909-w), 2022-07-25
Supplement: 41591_2022_1909_MOESM1_ESM.pdf [file 41591_2022_1909_MOESM1_ESM.pdf]

**Supplementary information**

---

**Symptoms and risk factors for long COVID  
in non-hospitalized adults**

---

In the format provided by the  
authors and unedited

*Supplementary Table 1: Baseline comorbidities of patients infected with SARS CoV-2 and propensity matched comparator cohort of patients with no recorded evidence of SARS CoV-2 infection*

| <b>Comorbidities</b>                  | <b>Cohort of patients infected with SARS CoV-2 (n=486,149) N (%)</b> | <b>Comparator cohort (n=1,944,580) N (%)</b> | <b>Standardised differences</b> |
|---------------------------------------|----------------------------------------------------------------------|----------------------------------------------|---------------------------------|
| Cancer                                | 21249 (4.37)                                                         | 83079 (4.27)                                 | 0.005                           |
| Arrhythmia                            | 34811 (7.16)                                                         | 136280 (7.01)                                | 0.006                           |
| AF                                    | 9609 (1.98)                                                          | 37397 (1.92)                                 | 0.004                           |
| Hypertension                          | 73901 (15.20)                                                        | 291389 (14.98)                               | 0.006                           |
| Heart Failure                         | 4342 (0.89)                                                          | 16699 (0.86)                                 | 0.004                           |
| IHD                                   | 13654 (2.81)                                                         | 53003 (2.73)                                 | 0.005                           |
| Myocardial Infarction                 | 6761 (1.39)                                                          | 26290 (1.35)                                 | 0.003                           |
| Valvular Heart Disease                | 6168 (1.27)                                                          | 24019 (1.24)                                 | 0.003                           |
| Cardiomyopathy                        | 1241 (0.26)                                                          | 4854 (0.25)                                  | 0.001                           |
| Congenital Heart Disease              | 2968 (0.61)                                                          | 11898 (0.61)                                 | 0.000                           |
| PVD                                   | 4622 (0.95)                                                          | 18188 (0.94)                                 | 0.002                           |
| Aortic Aneurysm                       | 966 (0.20)                                                           | 3756 (0.19)                                  | 0.001                           |
| TIA                                   | 4383 (0.90)                                                          | 16652 (0.86)                                 | 0.005                           |
| Ischaemic Stroke                      | 2426 (0.50)                                                          | 9353 (0.48)                                  | 0.003                           |
| Haemorrhagic Stroke                   | 1404 (0.29)                                                          | 5559 (0.29)                                  | 0.001                           |
| Stroke Unspecified                    | 3865 (0.80)                                                          | 14847 (0.76)                                 | 0.004                           |
| Eczema                                | 94313 (19.40)                                                        | 378604 (19.47)                               | 0.002                           |
| Psoriasis                             | 19881 (4.09)                                                         | 79206 (4.07)                                 | 0.001                           |
| Autoimmune Skin Conditions            | 6561 (1.35)                                                          | 26426 (1.36)                                 | 0.001                           |
| Acne                                  | 66474 (13.67)                                                        | 267760 (13.77)                               | 0.003                           |
| Hay Fever                             | 87691 (18.04)                                                        | 352090 (18.11)                               | 0.002                           |
| Chronic Sinusitis                     | 8403 (1.73)                                                          | 33231 (1.71)                                 | 0.002                           |
| Deafness                              | 5405 (1.11)                                                          | 21363 (1.10)                                 | 0.001                           |
| Blindness                             | 2263 (0.47)                                                          | 8825 (0.45)                                  | 0.002                           |
| Cataract                              | 16844 (3.46)                                                         | 64397 (3.31)                                 | 0.008                           |
| Glaucoma                              | 5132 (1.06)                                                          | 19804 (1.02)                                 | 0.004                           |
| AMD                                   | 3518 (0.72)                                                          | 13548 (0.70)                                 | 0.003                           |
| Diabetic Retinopathy                  | 13029 (2.68)                                                         | 51141 (2.63)                                 | 0.003                           |
| Inflammatory Eye Disease              | 8312 (1.71)                                                          | 33090 (1.70)                                 | 0.001                           |
| Peptic Ulcer                          | 6599 (1.36)                                                          | 25960 (1.33)                                 | 0.002                           |
| Inflammatory Bowel Disease            | 4736 (0.97)                                                          | 18880 (0.97)                                 | 0.000                           |
| Irritable Bowel Syndrome              | 34226 (7.04)                                                         | 136963 (7.04)                                | 0.000                           |
| Hepatitis B                           | 1394 (0.29)                                                          | 5535 (0.28)                                  | 0.000                           |
| Hepatitis C                           | 840 (0.17)                                                           | 3147 (0.16)                                  | 0.003                           |
| Alcohol related chronic liver disease | 884 (0.18)                                                           | 3421 (0.18)                                  | 0.001                           |
| NAFLD                                 | 6155 (1.27)                                                          | 24477 (1.26)                                 | 0.001                           |
| Chronic Liver Disease                 | 13573 (2.79)                                                         | 53899 (2.77)                                 | 0.001                           |
| Diverticular Disease                  | 14235 (2.93)                                                         | 55938 (2.88)                                 | 0.003                           |

|                          |                |                |       |
|--------------------------|----------------|----------------|-------|
| Coeliac Disease          | 2125 (0.44)    | 8553 (0.44)    | 0.000 |
| Chronic Pancreatitis     | 375 (0.08)     | 1450 (0.07)    | 0.001 |
| Endometriosis            | 7050 (1.45)    | 28035 (1.44)   | 0.001 |
| PCOS                     | 11963 (2.46)   | 47699 (2.45)   | 0.001 |
| Low Haemoglobin          | 26040 (5.36)   | 102708 (5.28)  | 0.003 |
| VTE                      | 9467 (1.95)    | 37297 (1.92)   | 0.002 |
| Coagulopathy             | 5490 (1.13)    | 21880 (1.13)   | 0.000 |
| Pernicious Anaemia       | 1263 (0.26)    | 4964 (0.26)    | 0.001 |
| Depression               | 107392 (22.09) | 428797 (22.05) | 0.001 |
| Anxiety                  | 98849 (20.33)  | 395365 (20.33) | 0.000 |
| Serious Mental Illness   | 5420 (1.11)    | 21044 (1.08)   | 0.003 |
| Substance Misuse         | 8523 (1.75)    | 32482 (1.67)   | 0.006 |
| Alcohol Misuse           | 24940 (5.13)   | 99002 (5.09)   | 0.002 |
| ADHD                     | 2521 (0.52)    | 10089 (0.52)   | 0.000 |
| Eating Disorder          | 4353 (0.90)    | 17365 (0.89)   | 0.000 |
| Learning Disability      | 4449 (0.92)    | 17907 (0.92)   | 0.001 |
| Alzheimer's              | 3978 (0.82)    | 13604 (0.70)   | 0.014 |
| Parkinson's disease      | 1036 (0.21)    | 3982 (0.20)    | 0.002 |
| Vascular dementia        | 2092 (0.43)    | 6617 (0.34)    | 0.015 |
| Migraine                 | 53881 (11.08)  | 215733 (11.09) | 0.000 |
| Multiple Sclerosis       | 1033 (0.21)    | 4203 (0.22)    | 0.001 |
| Epilepsy                 | 7718 (1.59)    | 30524 (1.57)   | 0.001 |
| Hemiplegia               | 726 (0.15)     | 2882 (0.15)    | 0.000 |
| Chronic Fatigue Syndrome | 1711 (0.35)    | 6716 (0.35)    | 0.001 |
| Fibromyalgia             | 5109 (1.05)    | 20364 (1.05)   | 0.000 |
| Cluster Headache         | 1717 (0.35)    | 6847 (0.35)    | 0.000 |
| Osteoarthritis           | 53694 (11.04)  | 211062 (10.85) | 0.006 |
| Back pain                | 6956 (1.43)    | 27386 (1.41)   | 0.002 |
| Fragility Fracture       | 46608 (9.59)   | 186194 (9.58)  | 0.000 |
| Falls                    | 39765 (8.18)   | 155875 (8.02)  | 0.006 |
| Polymyalgia Rheumatica   | 2187 (0.45)    | 8319 (0.43)    | 0.003 |
| Rheumatoid Arthritis     | 4144 (0.85)    | 16252 (0.84)   | 0.002 |
| Raynaud's Disease        | 5361 (1.10)    | 21244 (1.09)   | 0.001 |
| Sjogren's Syndrome       | 541 (0.11)     | 2184 (0.11)    | 0.000 |
| SLE                      | 601 (0.12)     | 2386 (0.12)    | 0.000 |
| Systemic Sclerosis       | 158 (0.03)     | 620 (0.03)     | 0.000 |
| Ankylosing Spondylitis   | 780 (0.16)     | 3067 (0.16)    | 0.001 |
| Gout                     | 14039 (2.89)   | 55919 (2.88)   | 0.001 |
| CKD                      | 14526 (2.99)   | 56107 (2.89)   | 0.006 |
| Asthma                   | 97509 (20.06)  | 390401 (20.08) | 0.000 |
| COPD                     | 10938 (2.25)   | 42308 (2.18)   | 0.005 |
| OSA                      | 6988 (1.44)    | 28024 (1.44)   | 0.000 |
| Other Pulmonary Disease  | 2631 (0.54)    | 10144 (0.52)   | 0.003 |
| Hypothyroidism           | 21065 (4.33)   | 83404 (4.29)   | 0.002 |
| Type 1 diabetes          | 2831 (0.58)    | 11150 (0.57)   | 0.001 |
| Type 2 diabetes          | 32457 (6.68)   | 128050 (6.58)  | 0.004 |

|                             |              |              |       |
|-----------------------------|--------------|--------------|-------|
| <b>AIDS</b>                 | 932 (0.19)   | 3731 (0.19)  | 0.000 |
| <b>BPH</b>                  | 6765 (1.39)  | 26293 (1.35) | 0.003 |
| <b>Erectile Dysfunction</b> | 21336 (4.39) | 84805 (4.36) | 0.001 |

AF= Atrial Fibrillation, IHD=Ischaemic Heart Disease, PVD=Peripheral Vascular Disease, TIA=Transient Ischaemic Attack, AMD=Age-related Macular Degeneration, NAFLD=Non-Alcoholic Fatty Liver Disease, PCOS=Poly Cystic Ovarian Syndrome, VTE=Venous Thromboembolism, ADHD=Attention Deficit Hyperactivity Disorder, SLE=Systemic Lupus Erythematosus, CKD=Chronic Kidney Disease, COPD=Chronic Obstructive Pulmonary Disease, OSA=Obstructive Sleep Apnoea, AIDS=Acquired Immune Deficiency Syndrome, BPH=Benign Prostatic Hyperplasia; standardised difference of less than 0.1 indicates a relatively small imbalance

Supplementary Table 2: Recording of symptoms between 3 and 12 months prior to index date comparing between patients infected with SARS CoV-2 and propensity matched comparator cohort of patients with no recorded evidence of SARS CoV-2 infection

| Domain               | Symptom                         | Cohort of patients infected with SARS CoV-2 (n=486,149) N (%) | Comparator cohort (n=1,944,580) N (%) | Adjusted OR (95% CI)* |
|----------------------|---------------------------------|---------------------------------------------------------------|---------------------------------------|-----------------------|
| Breathing            | Orthopnoea                      | 38 (0.01)                                                     | 124 (0.01)                            | 1.21 (0.84-1.75)      |
|                      | Paroxysmal nocturnal dyspnoea   | 26 (0.01)                                                     | 91 (0.00)                             | 1.11 (0.72-1.72)      |
|                      | Shortness of breath             | 8132 (1.67)                                                   | 31420 (1.62)                          | 1.01 (0.99-1.04)      |
|                      | Shortness of breath at rest     | 257 (0.05)                                                    | 945 (0.05)                            | 1.05 (0.92-1.21)      |
|                      | Shortness of breath on exertion | 7096 (1.46)                                                   | 27472 (1.41)                          | 1.01 (0.98-1.04)      |
|                      | Tachypnoea                      | 39 (0.01)                                                     | 157 (0.01)                            | 0.98 (0.69-1.39)      |
|                      | Wheezing                        | 2122 (0.44)                                                   | 8224 (0.42)                           | 1.02 (0.97-1.07)      |
| Pain                 | Chest pain                      | 8698 (1.79)                                                   | 34551 (1.78)                          | 0.99 (0.97-1.01)      |
|                      | Neuropathic pain                | 977 (0.20)                                                    | 3943 (0.20)                           | 0.97 (0.91-1.04)      |
|                      | Pain                            | 73174 (15.05)                                                 | 290921 (14.96)                        | 0.99 (0.98-1.00)      |
|                      | Pleuritic chest pain            | 323 (0.07)                                                    | 1245 (0.06)                           | 1.03 (0.91-1.16)      |
| Circulation          | Cold extremities                | 70 (0.01)                                                     | 298 (0.02)                            | 0.92 (0.71-1.20)      |
|                      | Limb swelling                   | 3308 (0.68)                                                   | 12855 (0.66)                          | 0.99 (0.96-1.03)      |
|                      | Orthostatic hypotension         | 445 (0.09)                                                    | 1472 (0.08)                           | 1.16 (1.04-1.29)      |
|                      | Palpitations                    | 2577 (0.53)                                                   | 10195 (0.52)                          | 1.00 (0.96-1.05)      |
|                      | Presyncope                      | 181 (0.04)                                                    | 738 (0.04)                            | 0.97 (0.83-1.15)      |
|                      | Tachycardia                     | 646 (0.13)                                                    | 2576 (0.13)                           | 0.99 (0.91-1.08)      |
| Fatigue              | Fatigue                         | 6327 (1.30)                                                   | 24977 (1.28)                          | 1.00 (0.98-1.03)      |
|                      | Post exertional fatigue         | 0 (0.00)                                                      | 0 (0.00)                              |                       |
| Cognitive health     | Amnesia                         | 1087 (0.22)                                                   | 4132 (0.21)                           | 1.00 (0.93-1.07)      |
|                      | Brain fog                       | 1494 (0.31)                                                   | 5873 (0.30)                           | 1.00 (0.94-1.06)      |
|                      | Difficulty understanding        | 7 (0.00)                                                      | 22 (0.00)                             | 1.21 (0.52-2.84)      |
|                      | Dysarthria                      | 68 (0.01)                                                     | 266 (0.01)                            | 0.98 (0.75-1.28)      |
|                      | Dysphasia                       | 34 (0.01)                                                     | 142 (0.01)                            | 0.92 (0.63-1.34)      |
|                      | Reading difficulty              | 1 (0.00)                                                      | 2 (0.00)                              | 1.89 (0.17-20.87)     |
| Movement             | Apraxia                         | 61 (0.01)                                                     | 242 (0.01)                            | 0.98 (0.74-1.30)      |
|                      | Balance difficulty              | 355 (0.07)                                                    | 1325 (0.07)                           | 1.02 (0.91-1.15)      |
|                      | Tremors                         | 434 (0.09)                                                    | 1669 (0.09)                           | 1.02 (0.92-1.14)      |
| Sleep                | Excessive sleep                 | 41 (0.01)                                                     | 145 (0.01)                            | 1.12 (0.79-1.59)      |
|                      | Insomnia                        | 3650 (0.75)                                                   | 14352 (0.74)                          | 1.00 (0.97-1.04)      |
| Ear, nose and throat | Anosmia                         | 609 (0.13)                                                    | 2307 (0.12)                           | 1.05 (0.96-1.14)      |
|                      | Cough                           | 18224 (3.75)                                                  | 71056 (3.65)                          | 1.00 (0.99-1.02)      |
|                      | Dysguesia                       | 480 (0.10)                                                    | 1827 (0.09)                           | 1.04 (0.94-1.15)      |

|                              |                                       |              |              |                  |
|------------------------------|---------------------------------------|--------------|--------------|------------------|
|                              | <b>Dysphagia</b>                      | 1296 (0.27)  | 4893 (0.25)  | 1.03 (0.96-1.09) |
|                              | <b>Ear pain</b>                       | 3895 (0.80)  | 15527 (0.80) | 1.00 (0.96-1.03) |
|                              | <b>Hearing loss</b>                   | 28 (0.01)    | 105 (0.01)   | 1.04 (0.68-1.58) |
|                              | <b>Hoarse voice</b>                   | 616 (0.13)   | 2368 (0.12)  | 1.02 (0.94-1.12) |
|                              | <b>Hyperacusis</b>                    | 15 (0.00)    | 62 (0.00)    | 0.95 (0.54-1.67) |
|                              | <b>Nasal congestion</b>               | 2352 (0.48)  | 9249 (0.48)  | 1.01 (0.96-1.05) |
|                              | <b>Phlegm</b>                         | 3535 (0.73)  | 13744 (0.71) | 1.00 (0.97-1.04) |
|                              | <b>Sneezing</b>                       | 79 (0.02)    | 292 (0.02)   | 1.07 (0.83-1.37) |
|                              | <b>Sore throat</b>                    | 11196 (2.30) | 42052 (2.16) | 1.06 (1.04-1.09) |
|                              | <b>Tinnitus</b>                       | 1869 (0.38)  | 7463 (0.38)  | 0.99 (0.94-1.04) |
| <b>Stomach and digestion</b> | <b>Abdominal pain</b>                 | 12486 (2.57) | 49419 (2.54) | 1.00 (0.98-1.02) |
|                              | <b>Bloating</b>                       | 1210 (0.25)  | 4637 (0.24)  | 1.03 (0.97-1.10) |
|                              | <b>Bowel incontinence</b>             | 765 (0.16)   | 2424 (0.12)  | 1.20 (1.10-1.30) |
|                              | <b>Constipation</b>                   | 3892 (0.80)  | 15154 (0.78) | 1.00 (0.96-1.04) |
|                              | <b>Diarrhoea</b>                      | 4205 (0.86)  | 16273 (0.84) | 1.01 (0.98-1.05) |
|                              | <b>Gastric reflux</b>                 | 3961 (0.81)  | 15656 (0.81) | 1.00 (0.97-1.04) |
|                              | <b>gastritis</b>                      | 1804 (0.37)  | 7161 (0.37)  | 0.99 (0.94-1.04) |
|                              | <b>Nausea</b>                         | 1389 (0.29)  | 5374 (0.28)  | 1.02 (0.97-1.09) |
|                              | <b>Vomiting</b>                       | 1678 (0.35)  | 6552 (0.34)  | 1.01 (0.95-1.06) |
|                              | <b>Weight gain</b>                    | 384 (0.08)   | 1525 (0.08)  | 1.00 (0.90-1.12) |
|                              | <b>Weight loss</b>                    | 1071 (0.22)  | 4057 (0.21)  | 1.01 (0.94-1.08) |
| <b>Muscles and joints</b>    | <b>Asthenia</b>                       | 239 (0.05)   | 910 (0.05)   | 1.01 (0.88-1.17) |
|                              | <b>Joint pain</b>                     | 3265 (0.67)  | 12820 (0.66) | 1.00 (0.97-1.04) |
|                              | <b>Joint stiffness</b>                | 36 (0.01)    | 152 (0.01)   | 0.94 (0.65-1.35) |
|                              | <b>Muscle cramping</b>                | 905 (0.19)   | 3498 (0.18)  | 1.02 (0.95-1.10) |
|                              | <b>Muscle pain</b>                    | 1499 (0.31)  | 5854 (0.30)  | 1.02 (0.96-1.08) |
|                              | <b>Muscle twitch</b>                  | 5 (0.00)     | 19 (0.00)    | 1.02 (0.38-2.72) |
|                              | <b>Paraesthesia</b>                   | 1782 (0.37)  | 6942 (0.36)  | 1.02 (0.96-1.07) |
| <b>Mental health</b>         | <b>Anhedonia</b>                      | 1555 (0.32)  | 6204 (0.32)  | 0.98 (0.93-1.04) |
|                              | <b>Anorexia</b>                       | 891 (0.18)   | 3366 (0.17)  | 1.02 (0.95-1.10) |
|                              | <b>Anxiety</b>                        | 18670 (3.84) | 74351 (3.82) | 1.00 (0.99-1.02) |
|                              | <b>Anxiety and depression</b>         | 8190 (1.68)  | 32806 (1.69) | 1.00 (0.98-1.03) |
|                              | <b>Depression</b>                     | 18828 (3.87) | 75291 (3.87) | 1.00 (0.98-1.02) |
|                              | <b>Increased appetite</b>             | 39 (0.01)    | 158 (0.01)   | 0.98 (0.69-1.39) |
|                              | <b>loneliness</b>                     | 114 (0.02)   | 443 (0.02)   | 1.00 (0.81-1.23) |
|                              | <b>Mood swings</b>                    | 281 (0.06)   | 1093 (0.06)  | 1.01 (0.89-1.16) |
|                              | <b>Post-traumatic stress disorder</b> | 116 (0.02)   | 455 (0.02)   | 1.04 (0.85-1.28) |
| <b>Hair, skin and nails</b>  | <b>Dry and scaly skin</b>             | 684 (0.14)   | 2660 (0.14)  | 1.00 (0.92-1.09) |
|                              | <b>Hair loss</b>                      | 1254 (0.26)  | 4892 (0.25)  | 1.03 (0.96-1.09) |
|                              | <b>Hives</b>                          | 1075 (0.22)  | 4167 (0.21)  | 1.02 (0.96-1.09) |
|                              | <b>Itchy skin</b>                     | 1815 (0.37)  | 7108 (0.37)  | 1.00 (0.95-1.05) |
|                              | <b>Nail changes</b>                   | 1636 (0.34)  | 6593 (0.34)  | 0.98 (0.93-1.04) |
|                              | <b>Purpura</b>                        | 82 (0.02)    | 329 (0.02)   | 0.97 (0.76-1.24) |
|                              | <b>Rash</b>                           | 7979 (1.64)  | 31669 (1.63) | 0.99 (0.97-1.02) |
| <b>Eyes</b>                  | <b>Diplopia</b>                       | 325 (0.07)   | 1225 (0.06)  | 1.05 (0.93-1.18) |

|                            |                                     |              |                  |                  |
|----------------------------|-------------------------------------|--------------|------------------|------------------|
|                            | <b>Dry eye</b>                      | 906 (0.19)   | 3641 (0.19)      | 0.97 (0.90-1.05) |
|                            | <b>Eye pain</b>                     | 240 (0.05)   | 969 (0.05)       | 0.98 (0.85-1.13) |
|                            | <b>Flashing lights and floaters</b> | 140 (0.03)   | 542 (0.03)       | 1.03 (0.86-1.24) |
|                            | <b>Itchy eyes</b>                   | 128 (0.03)   | 444 (0.02)       | 1.13 (0.93-1.38) |
|                            | <b>Photophobia</b>                  | 53 (0.01)    | 197 (0.01)       | 1.08 (0.80-1.47) |
|                            | <b>Red eye</b>                      | 2520 (0.52)  | 9882 (0.51)      | 0.99 (0.95-1.04) |
|                            | <b>Watery eyes</b>                  | 134 (0.03)   | 523 (0.03)       | 1.00 (0.83-1.21) |
| <b>Reproductive health</b> | <b>Ejaculation difficulty</b>       | 89 (0.02)    | 329 (0.02)       | 1.07 (0.84-1.35) |
|                            | <b>Erectile dysfunction</b>         | 1543 (0.32)  | 6152 (0.32)      | 0.97 (0.92-1.03) |
|                            | <b>Menorrhagia</b>                  | 2623 (0.54)  | 10374 (0.53)     | 1.01 (0.97-1.06) |
|                            | <b>Menstrual changes</b>            | 2532 (0.52)  | 9902 (0.51)      | 1.03 (0.99-1.08) |
|                            | <b>Premenstrual syndrome</b>        | 255 (0.05)   | 1044 (0.05)      | 0.98 (0.86-1.13) |
|                            | <b>Vaginal discharge</b>            | 4134 (0.85)  | 16480 (0.85)     | 1.01 (0.97-1.04) |
|                            | <b>Vaginal dryness</b>              | 191 (0.04)   | 797 (0.04)       | 0.94 (0.80-1.10) |
|                            | <b>Anorgasm</b>                     | 3 (0.00)     | 8 (0.00)         | 1.62 (0.43-6.10) |
|                            | <b>Reduced libido</b>               | 136 (0.03)   | 520 (0.03)       | 1.04 (0.86-1.26) |
| <b>Other symptoms</b>      | <b>Allergies</b>                    | 4908 (1.01)  | 19148 (0.98)     | 1.02 (0.99-1.05) |
|                            | <b>Angioedema</b>                   | 517 (0.11)   | 1953 (0.10)      | 1.05 (0.95-1.15) |
|                            | <b>Body ache</b>                    | 755 (0.16)   | 2883 (0.15)      | 1.03 (0.95-1.12) |
|                            | <b>Chills and shivering</b>         | 121 (0.02)   | 411 (0.02)       |                  |
|                            | <b>Dizziness</b>                    | 3480 (0.72)  | 13754 (0.71)     | 0.99 (0.96-1.03) |
|                            | <b>Dry mouth</b>                    | 246 (0.05)   | 950 (0.05)       | 1.01 (0.87-1.16) |
|                            | <b>Fever</b>                        | 3315 (0.68)  | 12481 (0.64)     | 1.04 (1.00-1.09) |
|                            | <b>Haemoptysis</b>                  | 322 (0.07)   | 1260 (0.06)      | 1.00 (0.89-1.14) |
|                            | <b>Hallucinations</b>               | 243 (0.05)   | 928 (0.05)       | 1.01 (0.88-1.16) |
|                            | <b>Headache</b>                     | 12361 (2.54) | 48501 (2.49)     | 1.01 (0.99-1.03) |
|                            | <b>Hot flushes</b>                  | 789 (0.16)   | 3182 (0.16)      | 0.97 (0.90-1.05) |
|                            | <b>Mouth ulcer</b>                  | 628 (0.13)   | 2483 (0.13)      | 1.00 (0.91-1.09) |
|                            | <b>Neurasthenia</b>                 | 19 (0.00)    | 66 (0.00)        | 1.18 (0.71-1.97) |
|                            | <b>Polydipsia</b>                   | 104 (0.02)   | 418 (0.02)       | 0.98 (0.79-1.22) |
|                            | <b>Polyuria</b>                     | 2783 (0.57)  | 10927 (0.56)     | 1.00 (0.96-1.04) |
|                            | <b>Seizures</b>                     | 695 (0.14)   | 2659 (0.14)      | 1.03 (0.94-1.12) |
|                            | <b>Sweating</b>                     | 846 (0.17)   | 3386 (0.17)      | 0.99 (0.92-1.07) |
|                            | <b>Swelling of lymph nodes</b>      | 1406 (0.29)  | 5489 (0.28)      | 1.02 (0.97-1.09) |
|                            | <b>Urinary incontinence</b>         | 2190 (0.45)  | 8004 (0.41)      | 1.05 (1.00-1.11) |
|                            | <b>Urinary retention</b>            | 442 (0.09)   | 1719 (0.09)      | 0.98 (0.89-1.09) |
| <b>Vertigo</b>             | 2220 (0.46)                         | 8715 (0.45)  | 1.00 (0.96-1.05) |                  |

\*Adjusted for age, sex, body mass index, smoking status, ethnicity and socioeconomic deprivation

Supplementary Table 3A: Recording of symptoms after twelve weeks from index date comparing between patients infected with SARS CoV-2 and propensity matched comparator cohort of patients with no recorded evidence of SARS CoV-2 infection

| Domain                    | Symptom                                                                                                            | Cohort of patients infected with SARS CoV-2 (n=384,137) N (%) | Comparator cohort (n=1,501,689) N (%) | Adjusted HR (95% CI)* |
|---------------------------|--------------------------------------------------------------------------------------------------------------------|---------------------------------------------------------------|---------------------------------------|-----------------------|
| Composite Symptom outcome | Composite of symptoms in the definition for Long COVID from WHO report                                             | 20864 (5.43)                                                  | 65293 (4.35)                          | 1.26 (1.25-1.28)      |
|                           | Composite of symptoms that were significantly associated with COVID-19 exposure after twelve weeks from index date | 35705 (9.29)                                                  | 110737 (7.37)                         | 1.29 (1.28-1.31)      |
| Breathing                 | Orthopnoea                                                                                                         | 10 (0.00)                                                     | 41 (0.00)                             | 1.07 (0.54-2.15)      |
|                           | Paroxysmal nocturnal dyspnoea                                                                                      | 3 (0.00)                                                      | 23 (0.00)                             | 0.60 (0.18-1.99)      |
|                           | Shortness of breath                                                                                                | 1615 (0.42)                                                   | 5398 (0.36)                           | 1.31 (1.24-1.38)      |
|                           | Shortness of breath at rest                                                                                        | 51 (0.01)                                                     | 105 (0.01)                            | 2.20 (1.57-3.08)      |
|                           | Shortness of breath on exertion                                                                                    | 1406 (0.37)                                                   | 4905 (0.33)                           | 1.26 (1.18-1.33)      |
|                           | Tachypnoea                                                                                                         | 4 (0.00)                                                      | 16 (0.00)                             | 1.00 (0.33-2.99)      |
|                           | Wheezing                                                                                                           | 410 (0.11)                                                    | 1164 (0.08)                           | 1.42 (1.27-1.59)      |
| Pain                      | Chest pain                                                                                                         | 1821 (0.47)                                                   | 5096 (0.34)                           | 1.42 (1.35-1.50)      |
|                           | Neuropathic pain                                                                                                   | 76 (0.02)                                                     | 345 (0.02)                            | 0.86 (0.67-1.11)      |
|                           | Pain                                                                                                               | 14958 (3.89)                                                  | 47694 (3.18)                          | 1.25 (1.23-1.27)      |
|                           | Pleuritic chest pain                                                                                               | 73 (0.02)                                                     | 157 (0.01)                            | 1.86 (1.41-2.46)      |
| Circulation               | Cold extremities                                                                                                   | 30 (0.01)                                                     | 87 (0.01)                             | 1.40 (0.92-2.12)      |
|                           | Limb swelling                                                                                                      | 674 (0.18)                                                    | 2398 (0.16)                           | 1.25 (1.15-1.36)      |
|                           | Orthostatic hypotension                                                                                            | 95 (0.02)                                                     | 342 (0.02)                            | 1.24 (0.99-1.56)      |
|                           | Palpitations                                                                                                       | 682 (0.18)                                                    | 1738 (0.12)                           | 1.53 (1.40-1.67)      |
|                           | Presyncope                                                                                                         | 27 (0.01)                                                     | 169 (0.01)                            | 0.70 (0.47-1.06)      |
|                           | Tachycardia                                                                                                        | 172 (0.04)                                                    | 481 (0.03)                            | 1.44 (1.21-1.72)      |
| Fatigue                   | Fatigue                                                                                                            | 1754 (0.46)                                                   | 3559 (0.24)                           | 1.92 (1.81-2.03)      |
|                           | Post exertional fatigue                                                                                            | 0 (0.00)                                                      | 0 (0.00)                              |                       |
| Cognitive health          | Amnesia                                                                                                            | 201 (0.05)                                                    | 839 (0.06)                            | 1.05 (0.90-1.22)      |
|                           | Brain fog                                                                                                          | 221 (0.06)                                                    | 627 (0.04)                            | 1.37 (1.17-1.59)      |
|                           | Difficulty understanding                                                                                           | 4 (0.00)                                                      | 12 (0.00)                             | 1.27 (0.41-3.94)      |
|                           | Dysarthria                                                                                                         | 19 (0.00)                                                     | 67 (0.00)                             | 1.28 (0.77-2.13)      |
|                           | Dysphasia                                                                                                          | 11 (0.00)                                                     | 33 (0.00)                             | 1.43 (0.72-2.85)      |
|                           | Reading difficulty                                                                                                 | 0 (0.00)                                                      | 0 (0.00)                              |                       |
| Movement                  | Apraxia                                                                                                            | 15 (0.00)                                                     | 55 (0.00)                             | 1.12 (0.63-1.99)      |



|                              |                                       |             |              |                   |
|------------------------------|---------------------------------------|-------------|--------------|-------------------|
|                              | <b>Balance difficulty</b>             | 61 (0.02)   | 262 (0.02)   | 1.05 (0.80-1.39)  |
|                              | <b>Tremors</b>                        | 104 (0.03)  | 395 (0.03)   | 1.12 (0.90-1.39)  |
| <b>Sleep</b>                 | <b>Excessive sleep</b>                | 6 (0.00)    | 37 (0.00)    | 0.65 (0.27-1.54)  |
|                              | <b>Insomnia</b>                       | 746 (0.19)  | 2190 (0.15)  | 1.34 (1.23-1.46)  |
| <b>Ear, nose and throat</b>  | <b>Anosmia</b>                        | 153 (0.04)  | 95 (0.01)    | 6.49 (5.02-8.39)  |
|                              | <b>Cough</b>                          | 2127 (0.55) | 6126 (0.41)  | 1.44 (1.37-1.51)  |
|                              | <b>Dysgeusia</b>                      | 42 (0.01)   | 180 (0.01)   | 0.97 (0.69-1.36)  |
|                              | <b>Dysphagia</b>                      | 334 (0.09)  | 864 (0.06)   | 1.60 (1.41-1.82)  |
|                              | <b>Ear pain</b>                       | 606 (0.16)  | 2044 (0.14)  | 1.16 (1.06-1.27)  |
|                              | <b>Hearing loss</b>                   | 11 (0.00)   | 33 (0.00)    | 1.52 (0.77-3.02)  |
|                              | <b>Hoarse voice</b>                   | 125 (0.03)  | 295 (0.02)   | 1.78 (1.44-2.20)  |
|                              | <b>Hyperacusis</b>                    | 2 (0.00)    | 11 (0.00)    | 0.67 (0.15-3.05)  |
|                              | <b>Nasal congestion</b>               | 396 (0.10)  | 1165 (0.08)  | 1.34 (1.20-1.50)  |
|                              | <b>Phlegm</b>                         | 429 (0.11)  | 1390 (0.09)  | 1.33 (1.19-1.48)  |
|                              | <b>Sneezing</b>                       | 14 (0.00)   | 20 (0.00)    | 2.77 (1.40-5.50)  |
|                              | <b>Sore throat</b>                    | 359 (0.09)  | 1365 (0.09)  | 1.02 (0.91-1.15)  |
|                              | <b>Tinnitus</b>                       | 195 (0.05)  | 824 (0.05)   | 0.92 (0.78-1.07)  |
| <b>Stomach and digestion</b> | <b>Abdominal pain</b>                 | 2442 (0.64) | 7818 (0.52)  | 1.21 (1.16-1.27)  |
|                              | <b>Bloating</b>                       | 270 (0.07)  | 814 (0.05)   | 1.31 (1.14-1.50)  |
|                              | <b>Bowel incontinence</b>             | 185 (0.05)  | 432 (0.03)   | 1.58 (1.33-1.88)  |
|                              | <b>Constipation</b>                   | 829 (0.22)  | 2856 (0.19)  | 1.20 (1.11-1.30)  |
|                              | <b>Diarrhoea</b>                      | 693 (0.18)  | 2240 (0.15)  | 1.29 (1.19-1.41)  |
|                              | <b>Gastric reflux</b>                 | 736 (0.19)  | 2778 (0.18)  | 1.05 (0.96-1.13)  |
|                              | <b>gastritis</b>                      | 333 (0.09)  | 1112 (0.07)  | 1.20 (1.07-1.36)  |
|                              | <b>Nausea</b>                         | 309 (0.08)  | 891 (0.06)   | 1.37 (1.20-1.56)  |
|                              | <b>Vomiting</b>                       | 369 (0.10)  | 995 (0.07)   | 1.48 (1.31-1.67)  |
|                              | <b>Weight gain</b>                    | 96 (0.02)   | 292 (0.02)   | 1.27 (1.01-1.61)  |
|                              | <b>Weight loss</b>                    | 278 (0.07)  | 854 (0.06)   | 1.34 (1.17-1.53)  |
| <b>Muscles and joints</b>    | <b>Asthenia</b>                       | 57 (0.01)   | 163 (0.01)   | 1.45 (1.07-1.96)  |
|                              | <b>Joint pain</b>                     | 659 (0.17)  | 2133 (0.14)  | 1.23 (1.13-1.35)  |
|                              | <b>Joint stiffness</b>                | 10 (0.00)   | 28 (0.00)    | 1.51 (0.73-3.12)  |
|                              | <b>Muscle cramping</b>                | 152 (0.04)  | 574 (0.04)   | 1.08 (0.90-1.29)  |
|                              | <b>Muscle pain</b>                    | 310 (0.08)  | 1082 (0.07)  | 1.13 (0.99-1.28)  |
|                              | <b>Muscle twitch</b>                  | 3 (0.00)    | 3 (0.00)     | 3.37 (0.68-16.82) |
|                              | <b>Paraesthesia</b>                   | 418 (0.11)  | 1241 (0.08)  | 1.34 (1.20-1.50)  |
| <b>Mental health</b>         | <b>Anhedonia</b>                      | 209 (0.05)  | 598 (0.04)   | 1.36 (1.16-1.59)  |
|                              | <b>Anorexia</b>                       | 174 (0.05)  | 566 (0.04)   | 1.28 (1.08-1.52)  |
|                              | <b>Anxiety</b>                        | 3732 (0.97) | 12583 (0.84) | 1.12 (1.08-1.16)  |
|                              | <b>Anxiety and depression</b>         | 1705 (0.44) | 6182 (0.41)  | 1.05 (1.00-1.11)  |
|                              | <b>Depression</b>                     | 3441 (0.90) | 12117 (0.81) | 1.09 (1.05-1.13)  |
|                              | <b>Increased appetite</b>             | 5 (0.00)    | 30 (0.00)    | 0.68 (0.26-1.75)  |
|                              | <b>loneliness</b>                     | 7 (0.00)    | 59 (0.00)    | 0.49 (0.22-1.06)  |
|                              | <b>Mood swings</b>                    | 60 (0.02)   | 199 (0.01)   | 1.14 (0.86-1.53)  |
|                              | <b>Post-traumatic stress disorder</b> | 27 (0.01)   | 137 (0.01)   | 0.76 (0.50-1.15)  |
|                              | <b>Dry and scaly skin</b>             | 186 (0.05)  | 577 (0.04)   | 1.30 (1.10-1.53)  |

|                             |                                     |             |                  |                  |
|-----------------------------|-------------------------------------|-------------|------------------|------------------|
| <b>Hair, skin and nails</b> | <b>Hair loss</b>                    | 869 (0.23)  | 825 (0.05)       | 3.99 (3.63-4.39) |
|                             | <b>Hives</b>                        | 168 (0.04)  | 545 (0.04)       | 1.18 (0.99-1.40) |
|                             | <b>Itchy skin</b>                   | 358 (0.09)  | 1098 (0.07)      | 1.34 (1.19-1.51) |
|                             | <b>Nail changes</b>                 | 298 (0.08)  | 970 (0.06)       | 1.20 (1.05-1.37) |
|                             | <b>Purpura</b>                      | 15 (0.00)   | 57 (0.00)        | 1.06 (0.60-1.87) |
|                             | <b>Rash</b>                         | 1495 (0.39) | 4790 (0.32)      | 1.24 (1.17-1.32) |
| <b>Eyes</b>                 | <b>Diplopia</b>                     | 77 (0.02)   | 244 (0.02)       | 1.29 (1.00-1.67) |
|                             | <b>Dry eye</b>                      | 217 (0.06)  | 700 (0.05)       | 1.28 (1.10-1.49) |
|                             | <b>Eye pain</b>                     | 49 (0.01)   | 157 (0.01)       | 1.22 (0.88-1.68) |
|                             | <b>Flashing lights and floaters</b> | 35 (0.01)   | 140 (0.01)       | 1.02 (0.70-1.48) |
|                             | <b>Itchy eyes</b>                   | 21 (0.01)   | 50 (0.00)        | 1.68 (1.01-2.79) |
|                             | <b>Photophobia</b>                  | 12 (0.00)   | 22 (0.00)        | 2.07 (1.02-4.19) |
|                             | <b>Red eye</b>                      | 358 (0.09)  | 1089 (0.07)      | 1.34 (1.19-1.51) |
|                             | <b>Watery eyes</b>                  | 16 (0.00)   | 53 (0.00)        | 1.25 (0.71-2.18) |
| <b>Reproductive health</b>  | <b>Ejaculation difficulty</b>       | 28 (0.01)   | 39 (0.00)        | 2.63 (1.61-4.28) |
|                             | <b>Erectile dysfunction</b>         | 284 (0.07)  | 921 (0.06)       | 1.26 (1.10-1.44) |
|                             | <b>Menorrhagia</b>                  | 490 (0.13)  | 1527 (0.10)      | 1.18 (1.07-1.31) |
|                             | <b>Menstrual changes</b>            | 525 (0.14)  | 1916 (0.13)      | 0.99 (0.90-1.09) |
|                             | <b>Premenstrual syndrome</b>        | 43 (0.01)   | 182 (0.01)       | 0.86 (0.61-1.19) |
|                             | <b>Vaginal discharge</b>            | 987 (0.26)  | 2894 (0.19)      | 1.26 (1.17-1.35) |
|                             | <b>Vaginal dryness</b>              | 34 (0.01)   | 133 (0.01)       | 1.03 (0.71-1.51) |
|                             | <b>Anorgasm</b>                     | 0 (0.00)    | 2 (0.00)         |                  |
|                             | <b>Reduced libido</b>               | 42 (0.01)   | 69 (0.00)        | 2.36 (1.61-3.47) |
| <b>Other symptoms</b>       | <b>Allergies</b>                    | 694 (0.18)  | 2042 (0.14)      | 1.30 (1.19-1.42) |
|                             | <b>Angioedema</b>                   | 89 (0.02)   | 305 (0.02)       | 1.15 (0.91-1.46) |
|                             | <b>Body ache</b>                    | 162 (0.04)  | 431 (0.03)       | 1.46 (1.22-1.75) |
|                             | <b>Chills and shivering</b>         | 15 (0.00)   | 46 (0.00)        | 1.36 (0.76-2.44) |
|                             | <b>Dizziness</b>                    | 753 (0.20)  | 2527 (0.17)      | 1.23 (1.13-1.33) |
|                             | <b>Dry mouth</b>                    | 67 (0.02)   | 179 (0.01)       | 1.56 (1.18-2.07) |
|                             | <b>Fever</b>                        | 357 (0.09)  | 839 (0.06)       | 1.75 (1.54-1.98) |
|                             | <b>Haemoptysis</b>                  | 64 (0.02)   | 192 (0.01)       | 1.39 (1.05-1.85) |
|                             | <b>Hallucinations</b>               | 44 (0.01)   | 181 (0.01)       | 1.01 (0.72-1.40) |
|                             | <b>Headache</b>                     | 2654 (0.69) | 7812 (0.52)      | 1.30 (1.24-1.35) |
|                             | <b>Hot flushes</b>                  | 153 (0.04)  | 407 (0.03)       | 1.52 (1.27-1.84) |
|                             | <b>Mouth ulcer</b>                  | 140 (0.04)  | 335 (0.02)       | 1.60 (1.32-1.95) |
|                             | <b>Neurasthenia</b>                 | 2 (0.00)    | 25 (0.00)        | 0.30 (0.07-1.28) |
|                             | <b>Polydipsia</b>                   | 27 (0.01)   | 77 (0.01)        | 1.36 (0.88-2.11) |
|                             | <b>Polyuria</b>                     | 512 (0.13)  | 1664 (0.11)      | 1.27 (1.15-1.40) |
|                             | <b>Seizures</b>                     | 132 (0.03)  | 484 (0.03)       | 1.05 (0.87-1.28) |
|                             | <b>Sweating</b>                     | 158 (0.04)  | 562 (0.04)       | 1.09 (0.91-1.30) |
|                             | <b>Swelling of lymph nodes</b>      | 135 (0.04)  | 429 (0.03)       | 1.18 (0.97-1.44) |
|                             | <b>Urinary incontinence</b>         | 505 (0.13)  | 1520 (0.10)      | 1.37 (1.24-1.52) |
|                             | <b>Urinary retention</b>            | 113 (0.03)  | 312 (0.02)       | 1.59 (1.28-1.97) |
| <b>Vertigo</b>              | 428 (0.11)                          | 1536 (0.10) | 1.15 (1.03-1.28) |                  |

\*Adjusted for age, sex, body mass index, smoking status, ethnicity, socioeconomic deprivation and symptom recorded at baseline between 3 and 12 months prior to index date



*Supplementary Table 3B: Number of recorded of symptoms after twelve weeks from the index date comparing patients infected with SARS CoV-2 and propensity matched comparator cohort of patients with no recorded evidence of SARS CoV-2 infection*

| <b>Number of recorded symptoms after twelve weeks from the index date</b> | <b>Cohort of patients infected with SARS CoV-2 (n=384,137) N (%)</b> | <b>Comparator cohort (n=1,501,689) N (%)</b> |
|---------------------------------------------------------------------------|----------------------------------------------------------------------|----------------------------------------------|
| <b>0</b>                                                                  | 330,044 (85.92)                                                      | 1,328,051 (88.44)                            |
| <b>1</b>                                                                  | 21,473 (5.59)                                                        | 70,562 (4.70)                                |
| <b>2</b>                                                                  | 13,808 (3.59)                                                        | 43,334 (2.89)                                |
| <b>3</b>                                                                  | 10,367 (2.70)                                                        | 32,652 (2.17)                                |
| <b>4</b>                                                                  | 5,378 (1.40)                                                         | 17,693 (1.18)                                |
| <b>5</b>                                                                  | 1,752 (0.46)                                                         | 5,541 (0.37)                                 |
| <b>6 or more</b>                                                          | 1,315 (0.34)                                                         | 3,856 (0.26)                                 |

Supplementary Table 4: Recording of symptoms during the first four weeks after index date comparing between patients infected with SARS CoV-2 and propensity matched comparator cohort of patients no recorded evidence of SARS CoV-2 infection

| Domain               | Symptom                         | Cohort of patients infected with SARS CoV-2 (n=486,149) N (%) | Comparator cohort (n=1,944,580) N (%) | Adjusted HR (95% CI)* |
|----------------------|---------------------------------|---------------------------------------------------------------|---------------------------------------|-----------------------|
| Breathing            | Orthopnoea                      | 11 (0.00)                                                     | 23 (0.00)                             | 1.50 (0.69-3.28)      |
|                      | Paroxysmal nocturnal dyspnoea   | 3 (0.00)                                                      | 2 (0.00)                              | 6.20 (1.03-37.18)     |
|                      | Shortness of breath             | 5564 (1.14)                                                   | 3245 (0.17)                           | 6.03 (5.76-6.31)      |
|                      | Shortness of breath at rest     | 440 (0.09)                                                    | 78 (0.00)                             | 19.75 (15.35-25.40)   |
|                      | Shortness of breath on exertion | 4507 (0.93)                                                   | 2899 (0.15)                           | 5.41 (5.15-5.68)      |
|                      | Tachypnoea                      | 23 (0.00)                                                     | 11 (0.00)                             | 6.91 (3.28-14.53)     |
|                      | Wheezing                        | 352 (0.07)                                                    | 827 (0.04)                            | 1.56 (1.37-1.78)      |
| Pain                 | Chest pain                      | 2657 (0.55)                                                   | 3400 (0.17)                           | 2.91 (2.76-3.07)      |
|                      | Neuropathic pain                | 85 (0.02)                                                     | 325 (0.02)                            | 1.04 (0.81-1.33)      |
|                      | Pain                            | 16645 (3.42)                                                  | 37941 (1.95)                          | 1.63 (1.60-1.66)      |
|                      | Pleuritic chest pain            | 224 (0.05)                                                    | 113 (0.01)                            | 7.36 (5.82-9.31)      |
| Circulation          | Cold extremities                | 14 (0.00)                                                     | 53 (0.00)                             | 1.05 (0.57-1.93)      |
|                      | Limb swelling                   | 341 (0.07)                                                    | 1274 (0.07)                           | 1.05 (0.92-1.18)      |
|                      | Orthostatic hypotension         | 163 (0.03)                                                    | 167 (0.01)                            | 2.84 (2.24-3.60)      |
|                      | Palpitations                    | 523 (0.11)                                                    | 1301 (0.07)                           | 1.58 (1.42-1.76)      |
|                      | Presyncope                      | 33 (0.01)                                                     | 103 (0.01)                            | 1.20 (0.79-1.82)      |
|                      | Tachycardia                     | 262 (0.05)                                                    | 260 (0.01)                            | 3.86 (3.23-4.61)      |
| Fatigue              | Fatigue                         | 3410 (0.70)                                                   | 2274 (0.12)                           | 5.65 (5.35-5.97)      |
|                      | Post exertional fatigue         | 0 (0.00)                                                      | 0 (0.00)                              |                       |
| Cognitive health     | Amnesia                         | 123 (0.03)                                                    | 390 (0.02)                            | 1.14 (0.92-1.41)      |
|                      | Brain fog                       | 134 (0.03)                                                    | 503 (0.03)                            | 1.05 (0.87-1.28)      |
|                      | Difficulty understanding        | 3 (0.00)                                                      | 4 (0.00)                              | 2.95 (0.66-13.25)     |
|                      | Dysarthria                      | 18 (0.00)                                                     | 28 (0.00)                             | 1.27 (0.60-2.70)      |
|                      | Dysphasia                       | 5 (0.00)                                                      | 18 (0.00)                             | 0.42 (0.10-1.84)      |
|                      | Reading difficulty              | 0 (0.00)                                                      | 0 (0.00)                              |                       |
| Movement             | Apraxia                         | 10 (0.00)                                                     | 41 (0.00)                             | 0.96 (0.48-1.92)      |
|                      | Balance difficulty              | 35 (0.01)                                                     | 129 (0.01)                            | 0.91 (0.61-1.35)      |
|                      | Tremors                         | 75 (0.02)                                                     | 254 (0.01)                            | 1.12 (0.86-1.47)      |
| Sleep                | Excessive sleep                 | 2 (0.00)                                                      | 15 (0.00)                             | 0.55 (0.13-2.42)      |
|                      | Insomnia                        | 617 (0.13)                                                    | 1775 (0.09)                           | 1.38 (1.26-1.52)      |
| Ear, nose and throat | Anosmia                         | 3303 (0.68)                                                   | 106 (0.01)                            | 107.42 (88.16-130.89) |
|                      | Cough                           | 11999 (2.47)                                                  | 4179 (0.21)                           | 9.96 (9.60-10.33)     |
|                      | Dysgeusia                       | 2726 (0.56)                                                   | 90 (0.00)                             | 111.13 (89.05-138.70) |

|                              |                                       |             |              |                  |
|------------------------------|---------------------------------------|-------------|--------------|------------------|
|                              | <b>Dysphagia</b>                      | 243 (0.05)  | 532 (0.03)   | 1.64 (1.39-1.92) |
|                              | <b>Ear pain</b>                       | 610 (0.13)  | 1617 (0.08)  | 1.46 (1.32-1.60) |
|                              | <b>Hearing loss</b>                   | 0 (0.00)    | 14 (0.00)    |                  |
|                              | <b>Hoarse voice</b>                   | 63 (0.01)   | 158 (0.01)   | 1.41 (1.03-1.93) |
|                              | <b>Hyperacusis</b>                    | 2 (0.00)    | 5 (0.00)     | 1.64 (0.32-8.45) |
|                              | <b>Nasal congestion</b>               | 333 (0.07)  | 772 (0.04)   | 1.65 (1.45-1.89) |
|                              | <b>Phlegm</b>                         | 2260 (0.46) | 891 (0.05)   | 8.64 (7.96-9.37) |
|                              | <b>Sneezing</b>                       | 7 (0.00)    | 21 (0.00)    | 1.33 (0.56-3.12) |
|                              | <b>Sore throat</b>                    | 2441 (0.50) | 1852 (0.10)  | 4.66 (4.36-4.97) |
|                              | <b>Tinnitus</b>                       | 138 (0.03)  | 636 (0.03)   | 0.84 (0.70-1.02) |
| <b>Stomach and digestion</b> | <b>Abdominal pain</b>                 | 1602 (0.33) | 6057 (0.31)  | 0.99 (0.94-1.05) |
|                              | <b>Bloating</b>                       | 109 (0.02)  | 573 (0.03)   | 0.73 (0.59-0.90) |
|                              | <b>Bowel incontinence</b>             | 83 (0.02)   | 239 (0.01)   | 1.15 (0.88-1.49) |
|                              | <b>Constipation</b>                   | 759 (0.16)  | 1808 (0.09)  | 1.55 (1.42-1.70) |
|                              | <b>Diarrhoea</b>                      | 1245 (0.26) | 1582 (0.08)  | 2.95 (2.73-3.19) |
|                              | <b>Gastric reflux</b>                 | 564 (0.12)  | 2003 (0.10)  | 1.10 (1.00-1.21) |
|                              | <b>gastritis</b>                      | 273 (0.06)  | 788 (0.04)   | 1.30 (1.12-1.50) |
|                              | <b>Nausea</b>                         | 612 (0.13)  | 662 (0.03)   | 3.58 (3.19-4.01) |
|                              | <b>Vomiting</b>                       | 573 (0.12)  | 682 (0.04)   | 2.99 (2.66-3.36) |
|                              | <b>Weight gain</b>                    | 37 (0.01)   | 200 (0.01)   | 0.78 (0.55-1.11) |
|                              | <b>Weight loss</b>                    | 229 (0.05)  | 520 (0.03)   | 1.66 (1.41-1.95) |
| <b>Muscles and joints</b>    | <b>Asthenia</b>                       | 123 (0.03)  | 79 (0.00)    | 5.47 (4.08-7.34) |
|                              | <b>Joint pain</b>                     | 274 (0.06)  | 1381 (0.07)  | 0.79 (0.69-0.90) |
|                              | <b>Joint stiffness</b>                | 0 (0.00)    | 22 (0.00)    |                  |
|                              | <b>Muscle cramping</b>                | 82 (0.02)   | 384 (0.02)   | 0.81 (0.64-1.04) |
|                              | <b>Muscle pain</b>                    | 1430 (0.29) | 859 (0.04)   | 6.14 (5.62-6.70) |
|                              | <b>Muscle twitch</b>                  | 0 (0.00)    | 2 (0.00)     |                  |
|                              | <b>Paraesthesia</b>                   | 205 (0.04)  | 798 (0.04)   | 1.03 (0.88-1.21) |
| <b>Mental health</b>         | <b>Anhedonia</b>                      | 123 (0.03)  | 487 (0.03)   | 1.02 (0.83-1.24) |
|                              | <b>Anorexia</b>                       | 461 (0.09)  | 358 (0.02)   | 4.48 (3.88-5.18) |
|                              | <b>Anxiety</b>                        | 3264 (0.67) | 13138 (0.68) | 0.97 (0.93-1.00) |
|                              | <b>Anxiety and depression</b>         | 1464 (0.30) | 6833 (0.35)  | 0.84 (0.79-0.89) |
|                              | <b>Depression</b>                     | 2844 (0.59) | 12740 (0.66) | 0.87 (0.84-0.91) |
|                              | <b>Increased appetite</b>             | 3 (0.00)    | 18 (0.00)    | 0.67 (0.20-2.26) |
|                              | <b>loneliness</b>                     | 13 (0.00)   | 49 (0.00)    | 1.18 (0.64-2.18) |
|                              | <b>Mood swings</b>                    | 18 (0.00)   | 125 (0.01)   | 0.52 (0.31-0.87) |
|                              | <b>Post-traumatic stress disorder</b> | 26 (0.01)   | 126 (0.01)   | 0.75 (0.48-1.18) |
| <b>Hair, skin and nails</b>  | <b>Dry and scaly skin</b>             | 81 (0.02)   | 287 (0.01)   | 1.14 (0.88-1.46) |
|                              | <b>Hair loss</b>                      | 136 (0.03)  | 579 (0.03)   | 0.91 (0.75-1.10) |
|                              | <b>Hives</b>                          | 183 (0.04)  | 458 (0.02)   | 1.49 (1.25-1.78) |
|                              | <b>Itchy skin</b>                     | 228 (0.05)  | 764 (0.04)   | 1.19 (1.02-1.39) |
|                              | <b>Nail changes</b>                   | 133 (0.03)  | 623 (0.03)   | 0.84 (0.69-1.01) |
|                              | <b>Purpura</b>                        | 10 (0.00)   | 34 (0.00)    | 1.38 (0.67-2.83) |
|                              | <b>Rash</b>                           | 1121 (0.23) | 3226 (0.17)  | 1.37 (1.27-1.47) |
| <b>Eyes</b>                  | <b>Diplopia</b>                       | 51 (0.01)   | 127 (0.01)   | 1.56 (1.12-2.18) |

|                            |                                     |             |             |                     |
|----------------------------|-------------------------------------|-------------|-------------|---------------------|
|                            | <b>Dry eye</b>                      | 73 (0.02)   | 420 (0.02)  | 0.70 (0.54-0.89)    |
|                            | <b>Eye pain</b>                     | 34 (0.01)   | 97 (0.00)   | 1.30 (0.87-1.95)    |
|                            | <b>Flashing lights and floaters</b> | 17 (0.00)   | 66 (0.00)   | 0.99 (0.57-1.71)    |
|                            | <b>Itchy eyes</b>                   | 11 (0.00)   | 35 (0.00)   | 1.32 (0.67-2.62)    |
|                            | <b>Photophobia</b>                  | 15 (0.00)   | 22 (0.00)   | 2.61 (1.33-5.14)    |
|                            | <b>Red eye</b>                      | 258 (0.05)  | 729 (0.04)  | 1.36 (1.18-1.58)    |
|                            | <b>Watery eyes</b>                  | 5 (0.00)    | 33 (0.00)   | 0.66 (0.25-1.69)    |
| <b>Reproductive health</b> | <b>Ejaculation difficulty</b>       | 14 (0.00)   | 33 (0.00)   | 1.55 (0.81-2.96)    |
|                            | <b>Erectile dysfunction</b>         | 142 (0.03)  | 594 (0.03)  | 0.90 (0.75-1.09)    |
|                            | <b>Menorrhagia</b>                  | 280 (0.06)  | 1147 (0.06) | 0.94 (0.82-1.07)    |
|                            | <b>Menstrual changes</b>            | 323 (0.07)  | 1443 (0.07) | 0.89 (0.79-1.00)    |
|                            | <b>Premenstrual syndrome</b>        | 23 (0.00)   | 141 (0.01)  | 0.64 (0.41-1.01)    |
|                            | <b>Vaginal discharge</b>            | 381 (0.08)  | 2027 (0.10) | 0.77 (0.69-0.86)    |
|                            | <b>Vaginal dryness</b>              | 18 (0.00)   | 74 (0.00)   | 1.03 (0.61-1.72)    |
|                            | <b>Anorgasm</b>                     | 0 (0.00)    | 2 (0.00)    | 0.39 (0.09-1.68)    |
|                            | <b>Reduced libido</b>               | 10 (0.00)   | 46 (0.00)   | 0.87 (0.44-1.72)    |
| <b>Other symptoms</b>      | <b>Allergies</b>                    | 284 (0.06)  | 1044 (0.05) | 1.06 (0.92-1.21)    |
|                            | <b>Angioedema</b>                   | 63 (0.01)   | 207 (0.01)  | 1.20 (0.90-1.59)    |
|                            | <b>Body ache</b>                    | 203 (0.04)  | 277 (0.01)  | 2.64 (2.18-3.19)    |
|                            | <b>Chills and shivering</b>         | 85 (0.02)   | 20 (0.00)   |                     |
|                            | <b>Dizziness</b>                    | 626 (0.13)  | 1628 (0.08) | 1.48 (1.34-1.63)    |
|                            | <b>Dry mouth</b>                    | 60 (0.01)   | 110 (0.01)  | 2.14 (1.55-2.96)    |
|                            | <b>Fever</b>                        | 4795 (0.99) | 508 (0.03)  | 30.22 (27.49-33.22) |
|                            | <b>Haemoptysis</b>                  | 287 (0.06)  | 119 (0.01)  | 7.76 (6.21-9.69)    |
|                            | <b>Hallucinations</b>               | 30 (0.01)   | 124 (0.01)  | 0.85 (0.55-1.31)    |
|                            | <b>Headache</b>                     | 9463 (1.95) | 5799 (0.30) | 5.65 (5.46-5.85)    |
|                            | <b>Hot flushes</b>                  | 43 (0.01)   | 311 (0.02)  | 0.55 (0.40-0.77)    |
|                            | <b>Mouth ulcer</b>                  | 104 (0.02)  | 222 (0.01)  | 1.86 (1.46-2.36)    |
|                            | <b>Neurasthenia</b>                 | 2 (0.00)    | 10 (0.00)   | 0.61 (0.12-3.21)    |
|                            | <b>Polydipsia</b>                   | 18 (0.00)   | 37 (0.00)   | 2.01 (1.12-3.60)    |
|                            | <b>Polyuria</b>                     | 391 (0.08)  | 1122 (0.06) | 1.33 (1.18-1.49)    |
|                            | <b>Seizures</b>                     | 148 (0.03)  | 357 (0.02)  | 1.38 (1.12-1.69)    |
|                            | <b>Sweating</b>                     | 111 (0.02)  | 351 (0.02)  | 1.18 (0.95-1.48)    |
|                            | <b>Swelling of lymph nodes</b>      | 124 (0.03)  | 327 (0.02)  | 1.33 (1.07-1.67)    |
|                            | <b>Urinary incontinence</b>         | 267 (0.05)  | 875 (0.04)  | 1.14 (0.99-1.32)    |
|                            | <b>Urinary retention</b>            | 148 (0.03)  | 162 (0.01)  | 2.28 (1.76-2.95)    |
|                            | <b>Vertigo</b>                      | 287 (0.06)  | 988 (0.05)  | 1.14 (1.00-1.31)    |

\*Adjusted for age, sex, body mass index, smoking status, ethnicity, socioeconomic deprivation and symptom recorded at baseline between 3 and 12 months prior to index date

Supplementary Table 5: Recording of symptoms between four and twelve weeks after index date comparing between patients infected with SARS CoV-2 and propensity matched comparator cohort of patients no recorded evidence of SARS CoV-2 infection

| Domain               | Symptom                         | Cohort of patients infected with SARS CoV-2 (n=472,660) N (%) | Comparator cohort (n=1,888,003) N (%) | Adjusted HR (95% CI)* |
|----------------------|---------------------------------|---------------------------------------------------------------|---------------------------------------|-----------------------|
| Breathing            | Orthopnoea                      | 14 (0.00)                                                     | 44 (0.00)                             | 1.33 (0.73-2.44)      |
|                      | Paroxysmal nocturnal dyspnoea   | 8 (0.00)                                                      | 17 (0.00)                             | 1.89 (0.81-4.39)      |
|                      | Shortness of breath             | 2203 (0.47)                                                   | 5633 (0.30)                           | 1.64 (1.56-1.73)      |
|                      | Shortness of breath at rest     | 76 (0.02)                                                     | 139 (0.01)                            | 2.26 (1.71-2.99)      |
|                      | Shortness of breath on exertion | 1881 (0.40)                                                   | 5035 (0.27)                           | 1.58 (1.50-1.67)      |
|                      | Tachypnoea                      | 16 (0.00)                                                     | 22 (0.00)                             | 2.94 (1.54-5.61)      |
|                      | Wheezing                        | 505 (0.11)                                                    | 1398 (0.07)                           | 1.45 (1.31-1.61)      |
| Pain                 | Chest pain                      | 2636 (0.56)                                                   | 6092 (0.32)                           | 1.73 (1.65-1.81)      |
|                      | Neuropathic pain                | 142 (0.03)                                                    | 565 (0.03)                            | 1.00 (0.83-1.21)      |
|                      | Pain                            | 19413 (4.11)                                                  | 64582 (3.42)                          | 1.21 (1.19-1.23)      |
|                      | Pleuritic chest pain            | 126 (0.03)                                                    | 166 (0.01)                            | 3.04 (2.41-3.83)      |
| Circulation          | Cold extremities                | 33 (0.01)                                                     | 94 (0.00)                             | 1.43 (0.96-2.12)      |
|                      | Limb swelling                   | 808 (0.17)                                                    | 2420 (0.13)                           | 1.41 (1.30-1.53)      |
|                      | Orthostatic hypotension         | 126 (0.03)                                                    | 322 (0.02)                            | 1.62 (1.32-1.99)      |
|                      | Palpitations                    | 942 (0.20)                                                    | 2282 (0.12)                           | 1.65 (1.53-1.78)      |
|                      | Presyncope                      | 41 (0.01)                                                     | 143 (0.01)                            | 1.19 (0.84-1.68)      |
|                      | Tachycardia                     | 259 (0.05)                                                    | 564 (0.03)                            | 1.85 (1.60-2.15)      |
| Fatigue              | Fatigue                         | 2264 (0.48)                                                   | 4268 (0.23)                           | 2.12 (2.02-2.23)      |
|                      | Post exertional fatigue         | 0 (0.00)                                                      | 1 (0.00)                              |                       |
| Cognitive health     | Amnesia                         | 255 (0.05)                                                    | 762 (0.04)                            | 1.36 (1.18-1.57)      |
|                      | Brain fog                       | 329 (0.07)                                                    | 932 (0.05)                            | 1.38 (1.21-1.56)      |
|                      | Difficulty understanding        | 2 (0.00)                                                      | 18 (0.00)                             | 0.45 (0.10-1.94)      |
|                      | Dysarthria                      | 18 (0.00)                                                     | 68 (0.00)                             | 1.12 (0.66-1.88)      |
|                      | Dysphasia                       | 10 (0.00)                                                     | 28 (0.00)                             | 1.56 (0.76-3.22)      |
|                      | Reading difficulty              | 0 (0.00)                                                      | 0 (0.00)                              |                       |
| Movement             | Apraxia                         | 18 (0.00)                                                     | 65 (0.00)                             | 1.14 (0.68-1.93)      |
|                      | Balance difficulty              | 67 (0.01)                                                     | 228 (0.01)                            | 1.20 (0.91-1.57)      |
|                      | Tremors                         | 129 (0.03)                                                    | 448 (0.02)                            | 1.18 (0.97-1.44)      |
| Sleep                | Excessive sleep                 | 10 (0.00)                                                     | 45 (0.00)                             | 0.87 (0.44-1.74)      |
|                      | Insomnia                        | 1097 (0.23)                                                   | 3168 (0.17)                           | 1.37 (1.28-1.47)      |
| Ear, nose and throat | Anosmia                         | 192 (0.04)                                                    | 128 (0.01)                            | 5.96 (4.77-7.46)      |
|                      | Cough                           | 3363 (0.71)                                                   | 7000 (0.37)                           | 1.95 (1.88-2.04)      |
|                      | Dysgeusia                       | 106 (0.02)                                                    | 96 (0.01)                             | 4.36 (3.31-5.75)      |



|                              |                                       |             |              |                  |
|------------------------------|---------------------------------------|-------------|--------------|------------------|
|                              | <b>Dysphagia</b>                      | 355 (0.08)  | 976 (0.05)   | 1.46 (1.29-1.65) |
|                              | <b>Ear pain</b>                       | 758 (0.16)  | 2765 (0.15)  | 1.09 (1.00-1.18) |
|                              | <b>Hearing loss</b>                   | 6 (0.00)    | 20 (0.00)    | 1.14 (0.46-2.85) |
|                              | <b>Hoarse voice</b>                   | 114 (0.02)  | 354 (0.02)   | 1.32 (1.07-1.63) |
|                              | <b>Hyperacusis</b>                    | 3 (0.00)    | 16 (0.00)    | 0.68 (0.20-2.37) |
|                              | <b>Nasal congestion</b>               | 447 (0.09)  | 1437 (0.08)  | 1.24 (1.12-1.38) |
|                              | <b>Phlegm</b>                         | 590 (0.12)  | 1424 (0.08)  | 1.71 (1.55-1.88) |
|                              | <b>Sneezing</b>                       | 11 (0.00)   | 27 (0.00)    | 1.61 (0.80-3.25) |
|                              | <b>Sore throat</b>                    | 771 (0.16)  | 3139 (0.17)  | 0.92 (0.85-1.00) |
|                              | <b>Tinnitus</b>                       | 357 (0.08)  | 1176 (0.06)  | 1.22 (1.08-1.37) |
| <b>Stomach and digestion</b> | <b>Abdominal pain</b>                 | 2882 (0.61) | 10267 (0.54) | 1.11 (1.07-1.16) |
|                              | <b>Bloating</b>                       | 276 (0.06)  | 987 (0.05)   | 1.12 (0.98-1.28) |
|                              | <b>Bowel incontinence</b>             | 180 (0.04)  | 463 (0.02)   | 1.43 (1.20-1.70) |
|                              | <b>Constipation</b>                   | 1059 (0.22) | 3225 (0.17)  | 1.33 (1.24-1.43) |
|                              | <b>Diarrhoea</b>                      | 801 (0.17)  | 2610 (0.14)  | 1.25 (1.15-1.35) |
|                              | <b>Gastric reflux</b>                 | 975 (0.21)  | 3328 (0.18)  | 1.17 (1.09-1.25) |
|                              | <b>gastritis</b>                      | 462 (0.10)  | 1309 (0.07)  | 1.40 (1.26-1.56) |
|                              | <b>Nausea</b>                         | 346 (0.07)  | 1125 (0.06)  | 1.23 (1.09-1.39) |
|                              | <b>Vomiting</b>                       | 404 (0.09)  | 1169 (0.06)  | 1.39 (1.24-1.55) |
|                              | <b>Weight gain</b>                    | 82 (0.02)   | 357 (0.02)   | 0.91 (0.72-1.16) |
|                              | <b>Weight loss</b>                    | 399 (0.08)  | 976 (0.05)   | 1.63 (1.45-1.83) |
| <b>Muscles and joints</b>    | <b>Asthenia</b>                       | 79 (0.02)   | 166 (0.01)   | 1.90 (1.46-2.49) |
|                              | <b>Joint pain</b>                     | 755 (0.16)  | 2560 (0.14)  | 1.18 (1.09-1.28) |
|                              | <b>Joint stiffness</b>                | 11 (0.00)   | 43 (0.00)    | 1.02 (0.53-1.99) |
|                              | <b>Muscle cramping</b>                | 187 (0.04)  | 690 (0.04)   | 1.08 (0.92-1.27) |
|                              | <b>Muscle pain</b>                    | 487 (0.10)  | 1385 (0.07)  | 1.40 (1.26-1.55) |
|                              | <b>Muscle twitch</b>                  | 0 (0.00)    | 2 (0.00)     |                  |
|                              | <b>Paraesthesia</b>                   | 461 (0.10)  | 1488 (0.08)  | 1.24 (1.12-1.38) |
| <b>Mental health</b>         | <b>Anhedonia</b>                      | 344 (0.07)  | 923 (0.05)   | 1.45 (1.28-1.64) |
|                              | <b>Anorexia</b>                       | 196 (0.04)  | 590 (0.03)   | 1.34 (1.14-1.57) |
|                              | <b>Anxiety</b>                        | 5483 (1.16) | 19550 (1.04) | 1.10 (1.07-1.13) |
|                              | <b>Anxiety and depression</b>         | 2584 (0.55) | 9962 (0.53)  | 1.02 (0.98-1.07) |
|                              | <b>Depression</b>                     | 5042 (1.07) | 19020 (1.01) | 1.05 (1.02-1.08) |
|                              | <b>Increased appetite</b>             | 15 (0.00)   | 41 (0.00)    | 1.47 (0.82-2.67) |
|                              | <b>loneliness</b>                     | 8 (0.00)    | 48 (0.00)    | 0.77 (0.36-1.63) |
|                              | <b>Mood swings</b>                    | 72 (0.02)   | 264 (0.01)   | 1.08 (0.83-1.40) |
|                              | <b>Post-traumatic stress disorder</b> | 38 (0.01)   | 188 (0.01)   | 0.80 (0.57-1.14) |
| <b>Hair, skin and nails</b>  | <b>Dry and scaly skin</b>             | 199 (0.04)  | 535 (0.03)   | 1.50 (1.27-1.76) |
|                              | <b>Hair loss</b>                      | 609 (0.13)  | 1066 (0.06)  | 2.26 (2.05-2.50) |
|                              | <b>Hives</b>                          | 210 (0.04)  | 717 (0.04)   | 1.16 (0.99-1.35) |
|                              | <b>Itchy skin</b>                     | 424 (0.09)  | 1280 (0.07)  | 1.34 (1.20-1.49) |
|                              | <b>Nail changes</b>                   | 368 (0.08)  | 1118 (0.06)  | 1.31 (1.17-1.48) |
|                              | <b>Purpura</b>                        | 16 (0.00)   | 61 (0.00)    | 1.10 (0.63-1.91) |
|                              | <b>Rash</b>                           | 1717 (0.36) | 5768 (0.31)  | 1.20 (1.14-1.26) |
| <b>Eyes</b>                  | <b>Diplopia</b>                       | 65 (0.01)   | 249 (0.01)   | 1.05 (0.80-1.38) |

|                            |                                     |             |                  |                  |
|----------------------------|-------------------------------------|-------------|------------------|------------------|
|                            | <b>Dry eye</b>                      | 194 (0.04)  | 735 (0.04)       | 1.08 (0.92-1.26) |
|                            | <b>Eye pain</b>                     | 53 (0.01)   | 163 (0.01)       | 1.28 (0.94-1.74) |
|                            | <b>Flashing lights and floaters</b> | 45 (0.01)   | 146 (0.01)       | 1.26 (0.90-1.76) |
|                            | <b>Itchy eyes</b>                   | 32 (0.01)   | 53 (0.00)        | 2.43 (1.56-3.77) |
|                            | <b>Photophobia</b>                  | 12 (0.00)   | 39 (0.00)        | 1.21 (0.63-2.32) |
|                            | <b>Red eye</b>                      | 392 (0.08)  | 1216 (0.06)      | 1.30 (1.16-1.46) |
|                            | <b>Watery eyes</b>                  | 23 (0.00)   | 77 (0.00)        | 1.20 (0.75-1.92) |
| <b>Reproductive health</b> | <b>Ejaculation difficulty</b>       | 23 (0.00)   | 53 (0.00)        | 1.65 (1.01-2.69) |
|                            | <b>Erectile dysfunction</b>         | 381 (0.08)  | 1069 (0.06)      | 1.41 (1.26-1.59) |
|                            | <b>Menorrhagia</b>                  | 593 (0.13)  | 2132 (0.11)      | 1.09 (0.99-1.19) |
|                            | <b>Menstrual changes</b>            | 732 (0.15)  | 2603 (0.14)      | 1.10 (1.01-1.19) |
|                            | <b>Premenstrual syndrome</b>        | 55 (0.01)   | 220 (0.01)       | 0.98 (0.73-1.31) |
|                            | <b>Vaginal discharge</b>            | 1254 (0.27) | 3829 (0.20)      | 1.28 (1.20-1.37) |
|                            | <b>Vaginal dryness</b>              | 39 (0.01)   | 134 (0.01)       | 1.20 (0.84-1.72) |
|                            | <b>Anorgasm</b>                     | 0 (0.00)    | 7 (0.00)         |                  |
|                            | <b>Reduced libido</b>               | 46 (0.01)   | 107 (0.01)       | 1.69 (1.20-2.39) |
| <b>Other symptoms</b>      | <b>Allergies</b>                    | 670 (0.14)  | 2333 (0.12)      | 1.16 (1.06-1.26) |
|                            | <b>Angioedema</b>                   | 116 (0.02)  | 369 (0.02)       | 1.26 (1.02-1.55) |
|                            | <b>Body ache</b>                    | 200 (0.04)  | 516 (0.03)       | 1.52 (1.29-1.79) |
|                            | <b>Chills and shivering</b>         | 16 (0.00)   | 60 (0.00)        | 1.07 (0.62-1.86) |
|                            | <b>Dizziness</b>                    | 840 (0.18)  | 2905 (0.15)      | 1.18 (1.09-1.27) |
|                            | <b>Dry mouth</b>                    | 73 (0.02)   | 198 (0.01)       | 1.52 (1.16-1.98) |
|                            | <b>Fever</b>                        | 497 (0.11)  | 944 (0.05)       | 2.12 (1.90-2.37) |
|                            | <b>Haemoptysis</b>                  | 105 (0.02)  | 243 (0.01)       | 1.73 (1.38-2.17) |
|                            | <b>Hallucinations</b>               | 60 (0.01)   | 187 (0.01)       | 1.31 (0.98-1.75) |
|                            | <b>Headache</b>                     | 3118 (0.66) | 10031 (0.53)     | 1.23 (1.18-1.28) |
|                            | <b>Hot flushes</b>                  | 150 (0.03)  | 500 (0.03)       | 1.21 (1.01-1.46) |
|                            | <b>Mouth ulcer</b>                  | 141 (0.03)  | 393 (0.02)       | 1.43 (1.18-1.74) |
|                            | <b>Neurasthenia</b>                 | 3 (0.00)    | 20 (0.00)        | 0.60 (0.18-2.01) |
|                            | <b>Polydipsia</b>                   | 22 (0.00)   | 91 (0.00)        | 0.96 (0.61-1.54) |
|                            | <b>Polyuria</b>                     | 632 (0.13)  | 2001 (0.11)      | 1.28 (1.17-1.40) |
|                            | <b>Seizures</b>                     | 183 (0.04)  | 583 (0.03)       | 1.25 (1.06-1.48) |
|                            | <b>Sweating</b>                     | 201 (0.04)  | 679 (0.04)       | 1.18 (1.01-1.38) |
|                            | <b>Swelling of lymph nodes</b>      | 192 (0.04)  | 586 (0.03)       | 1.28 (1.09-1.51) |
|                            | <b>Urinary incontinence</b>         | 567 (0.12)  | 1686 (0.09)      | 1.36 (1.24-1.49) |
|                            | <b>Urinary retention</b>            | 128 (0.03)  | 361 (0.02)       | 1.44 (1.17-1.76) |
| <b>Vertigo</b>             | 482 (0.10)                          | 1768 (0.09) | 1.11 (1.00-1.23) |                  |

\*Adjusted for age, sex, body mass index, smoking status, ethnicity, socioeconomic deprivation and symptom recorded at baseline between 3 and 12 months prior to index date

Supplementary Table 6: Comorbidity related risk factors associated with the development of Long COVID (WHO definition)

| Risk factor                      | Sample size<br>[N =<br>384,137] | Long COVID symptoms<br>[N=29,869] (7.78)<br>n (%) | Unadjusted HR<br>(95% CI) | Adjusted HR*<br>(95% CI) |
|----------------------------------|---------------------------------|---------------------------------------------------|---------------------------|--------------------------|
| <b>Comorbidities at baseline</b> |                                 |                                                   |                           |                          |
| COPD                             | 8040                            | 1741 (21.65)                                      | 2.71 (2.58-2.85)          | 1.55 (1.47-1.64)         |
| BPH                              | 4961                            | 596 (12.01)                                       | 1.39 (1.28-1.51)          | 1.39 (1.28-1.52)         |
| Fibromyalgia                     | 4031                            | 900 (22.33)                                       | 3.17 (2.97-3.39)          | 1.37 (1.28-1.47)         |
| Anxiety                          | 77753                           | 10481 (13.48)                                     | 2.17 (2.12-2.23)          | 1.35 (1.31-1.39)         |
| Erectile Dysfunction             | 16678                           | 1551 (9.30)                                       | 1.15 (1.09-1.21)          | 1.33 (1.26-1.41)         |
| Depression                       | 83903                           | 11222 (13.37)                                     | 2.22 (2.17-2.27)          | 1.31 (1.27-1.34)         |
| Migraine                         | 43043                           | 5597 (13.00)                                      | 1.88 (1.83-1.94)          | 1.26 (1.22-1.30)         |
| Multiple Sclerosis               | 791                             | 98 (12.39)                                        | 1.52 (1.25-1.85)          | 1.26 (1.03-1.53)         |
| Coeliac Disease                  | 1669                            | 207 (12.40)                                       | 1.58 (1.38-1.81)          | 1.25 (1.09-1.43)         |
| Learning Disability              | 3283                            | 295 (8.99)                                        | 1.22 (1.09-1.37)          | 1.24 (1.11-1.40)         |
| SLE                              | 485                             | 68 (14.02)                                        | 1.94 (1.53-2.46)          | 1.24 (0.97-1.58)         |
| Chronic Pancreatitis             | 276                             | 50 (18.12)                                        | 2.07 (1.57-2.73)          | 1.23 (0.93-1.63)         |
| IBS                              | 27492                           | 3691 (13.43)                                      | 1.84 (1.78-1.91)          | 1.20 (1.15-1.24)         |
| Endometriosis                    | 5727                            | 800 (13.97)                                       | 1.92 (1.79-2.06)          | 1.19 (1.11-1.28)         |
| Low Hb                           | 20039                           | 2683 (13.39)                                      | 1.78 (1.71-1.85)          | 1.18 (1.13-1.23)         |
| Ankylosing<br>Spondylitis        | 630                             | 63 (10.00)                                        | 1.31 (1.03-1.68)          | 1.18 (0.92-1.51)         |
| Deafness                         | 3767                            | 514 (13.64)                                       | 1.53 (1.40-1.67)          | 1.16 (1.06-1.27)         |
| Hepatitis C                      | 633                             | 74 (11.69)                                        | 1.43 (1.14-1.80)          | 1.16 (0.92-1.46)         |
| Eating disorder                  | 3488                            | 504 (14.45)                                       | 1.92 (1.75-2.09)          | 1.16 (1.06-1.27)         |
| Substance Misuse                 | 6449                            | 775 (12.02)                                       | 1.69 (1.58-1.82)          | 1.15 (1.07-1.23)         |
| Back pain                        | 5483                            | 718 (13.10)                                       | 1.76 (1.64-1.90)          | 1.15 (1.07-1.24)         |
| Asthma                           | 76946                           | 8527 (11.08)                                      | 1.59 (1.55-1.63)          | 1.15 (1.12-1.18)         |
| Chronic Sinusitis                | 6838                            | 873 (12.77)                                       | 1.63 (1.52-1.74)          | 1.14 (1.07-1.22)         |
| PCOS                             | 9599                            | 1166 (12.15)                                      | 1.73 (1.63-1.84)          | 1.14 (1.07-1.21)         |
| Coagulopathy                     | 4336                            | 505 (11.65)                                       | 1.49 (1.36-1.63)          | 1.14 (1.04-1.25)         |
| Hemiplegia                       | 512                             | 62 (12.11)                                        | 1.25 (0.97-1.60)          | 1.14 (0.88-1.46)         |
| Falls                            | 28946                           | 3811 (13.17)                                      | 1.59 (1.53-1.64)          | 1.14 (1.09-1.18)         |
| Raynaud's                        | 4241                            | 501 (11.81)                                       | 1.53 (1.40-1.67)          | 1.14 (1.03-1.27)         |
| Systemic Sclerosis               | 116                             | 15 (12.93)                                        | 1.75 (1.06-2.91)          | 1.14 (0.68-1.90)         |
| AIDS                             | 708                             | 62 (8.76)                                         | 1.12 (0.87-1.43)          | 1.14 (0.89-1.47)         |
| IHD                              | 9837                            | 1372 (13.95)                                      | 1.60 (1.52-1.69)          | 1.13 (1.06-1.21)         |
| Cardiomyopathy                   | 925                             | 107 (11.57)                                       | 1.44 (1.20-1.75)          | 1.12 (0.92-1.36)         |
| Inflammatory<br>Bowel Disease    | 3799                            | 414 (10.90)                                       | 1.37 (1.24-1.51)          | 1.12 (1.02-1.23)         |
| All Chronic Liver<br>Disease     | 10624                           | 1322 (12.44)                                      | 1.65 (1.56-1.75)          | 1.12 (1.03-1.21)         |
| Diverticular Disease             | 10610                           | 1441 (13.58)                                      | 1.60 (1.52-1.69)          | 1.12 (1.06-1.19)         |

|                                   |       |              |                  |                  |
|-----------------------------------|-------|--------------|------------------|------------------|
| <b>ADHD</b>                       | 1935  | 165 (8.53)   | 1.23 (1.05-1.43) | 1.12 (0.96-1.30) |
| <b>Polymyalgia Rheumatica</b>     | 1499  | 237 (15.81)  | 1.79 (1.57-2.03) | 1.12 (0.99-1.28) |
| <b>Hay fever</b>                  | 70648 | 6879 (9.74)  | 1.36 (1.33-1.40) | 1.11 (1.08-1.14) |
| <b>Peptic Ulcer</b>               | 4968  | 670 (13.49)  | 1.54 (1.43-1.67) | 1.11 (1.02-1.20) |
| <b>NAFLD</b>                      | 4837  | 632 (13.07)  | 1.80 (1.66-1.94) | 1.11 (0.99-1.24) |
| <b>Parkinson's</b>                | 638   | 84 (13.17)   | 1.25 (1.01-1.54) | 1.10 (0.89-1.37) |
| <b>Unspecified Stroke</b>         | 2576  | 384 (14.91)  | 1.49 (1.35-1.65) | 1.09 (0.98-1.22) |
| <b>Autoimmune Skin Conditions</b> | 5200  | 482 (9.27)   | 1.22 (1.11-1.33) | 1.09 (0.99-1.19) |
| <b>Cataract</b>                   | 11608 | 1571 (13.53) | 1.47 (1.40-1.55) | 1.09 (1.02-1.16) |
| <b>VTE</b>                        | 7035  | 925 (13.15)  | 1.52 (1.42-1.62) | 1.09 (1.02-1.17) |
| <b>Cluster Headache</b>           | 1359  | 166 (12.21)  | 1.63 (1.40-1.90) | 1.09 (0.93-1.27) |
| <b>Myocardial Infarction</b>      | 4795  | 624 (13.01)  | 1.47 (1.35-1.59) | 1.08 (0.99-1.18) |
| <b>Chronic Fatigue Syndrome</b>   | 1365  | 224 (16.41)  | 2.07 (1.82-2.36) | 1.08 (0.95-1.24) |
| <b>Osteoarthritis</b>             | 41007 | 4848 (11.82) | 1.47 (1.42-1.51) | 1.08 (1.04-1.12) |
| <b>Arrhythmia</b>                 | 24962 | 3151 (12.62) | 1.42 (1.36-1.47) | 1.07 (1.02-1.13) |
| <b>TIA</b>                        | 3052  | 452 (14.81)  | 1.56 (1.42-1.71) | 1.07 (0.97-1.18) |
| <b>OSA</b>                        | 5538  | 628 (11.34)  | 1.47 (1.36-1.59) | 1.07 (0.99-1.17) |
| <b>Acne</b>                       | 53994 | 4841 (8.97)  | 1.18 (1.15-1.22) | 1.06 (1.03-1.10) |
| <b>Alcohol Misuse</b>             | 19593 | 1925 (9.82)  | 1.24 (1.19-1.30) | 1.06 (1.01-1.11) |
| <b>AF</b>                         | 6557  | 880 (13.42)  | 1.38 (1.29-1.47) | 1.05 (0.97-1.14) |
| <b>AMD</b>                        | 2347  | 347 (14.78)  | 1.50 (1.35-1.66) | 1.05 (0.94-1.17) |
| <b>Epilepsy</b>                   | 5842  | 586 (10.03)  | 1.25 (1.15-1.35) | 1.05 (0.96-1.14) |
| <b>Valvular Heart Disease</b>     | 4451  | 584 (13.12)  | 1.45 (1.33-1.57) | 1.04 (0.96-1.14) |
| <b>Eczema</b>                     | 75272 | 6942 (9.22)  | 1.23 (1.20-1.26) | 1.04 (1.01-1.07) |
| <b>Psoriasis</b>                  | 15764 | 1487 (9.43)  | 1.23 (1.17-1.30) | 1.04 (0.99-1.10) |
| <b>Hypertension</b>               | 56002 | 5696 (10.17) | 1.25 (1.22-1.29) | 1.03 (0.99-1.06) |
| <b>Congenital Heart Disease</b>   | 2374  | 223 (9.39)   | 1.19 (1.05-1.36) | 1.03 (0.90-1.17) |
| <b>Aortic Aneurysm</b>            | 657   | 86 (13.09)   | 1.36 (1.10-1.68) | 1.03 (0.83-1.28) |
| <b>Inflammatory Eye Disease</b>   | 6528  | 636 (9.74)   | 1.19 (1.10-1.29) | 1.02 (0.94-1.10) |
| <b>Heart failure</b>              | 2930  | 461 (15.73)  | 1.61 (1.47-1.77) | 1.01 (0.92-1.12) |
| <b>Alcoholic Liver disease</b>    | 655   | 87 (13.28)   | 1.62 (1.31-2.00) | 1.01 (0.80-1.26) |
| <b>Haemorrhagic Stroke</b>        | 985   | 109 (11.07)  | 1.17 (0.97-1.42) | 1.00 (0.82-1.20) |
| <b>Blindness</b>                  | 1512  | 202 (13.36)  | 1.40 (1.22-1.61) | 1.00 (0.86-1.15) |
| <b>Fragility Fracture</b>         | 35823 | 3254 (9.08)  | 1.09 (1.05-1.13) | 1.00 (0.96-1.04) |
| <b>Gout</b>                       | 10838 | 949 (8.76)   | 1.02 (0.96-1.09) | 1.00 (0.94-1.07) |
| <b>Type 1 diabetes</b>            | 2234  | 198 (8.86)   | 1.08 (0.94-1.25) | 1.00 (0.87-1.16) |
| <b>Cancer</b>                     | 15856 | 1671 (10.54) | 1.21 (1.16-1.28) | 0.99 (0.94-1.05) |
| <b>Ischaemic Stroke</b>           | 1624  | 218 (13.42)  | 1.34 (1.17-1.53) | 0.99 (0.86-1.14) |

|                                |       |              |                  |                  |
|--------------------------------|-------|--------------|------------------|------------------|
| <b>Other Pulmonary Disease</b> | 1888  | 310 (16.42)  | 1.84 (1.64-2.06) | 0.99 (0.88-1.11) |
| <b>Hypothyroidism</b>          | 16202 | 1822 (11.25) | 1.42 (1.35-1.49) | 0.99 (0.94-1.04) |
| <b>Type 2 diabetes</b>         | 24500 | 2547 (10.40) | 1.26 (1.21-1.31) | 0.99 (0.94-1.05) |
| <b>Glaucoma</b>                | 3694  | 402 (10.88)  | 1.20 (1.09-1.32) | 0.98 (0.88-1.08) |
| <b>Hepatitis B</b>             | 1124  | 83 (7.38)    | 1.05 (0.84-1.30) | 0.98 (0.79-1.22) |
| <b>Hyperthyroidism</b>         | 4039  | 435 (10.77)  | 1.35 (1.23-1.48) | 0.98 (0.89-1.08) |
| <b>CKD</b>                     | 9820  | 1288 (13.12) | 1.34 (1.26-1.41) | 0.97 (0.91-1.03) |
| <b>Serious Mental Illness</b>  | 3891  | 518 (13.31)  | 1.51 (1.39-1.65) | 0.96 (0.88-1.05) |
| <b>PVD</b>                     | 3426  | 418 (12.20)  | 1.47 (1.33-1.62) | 0.94 (0.84-1.06) |
| <b>Sjogren's Syndrome</b>      | 433   | 60 (13.86)   | 1.71 (1.33-2.20) | 0.94 (0.73-1.22) |
| <b>Rheumatoid Arthritis</b>    | 3180  | 379 (11.92)  | 1.39 (1.26-1.54) | 0.92 (0.83-1.02) |
| <b>Diabetic Retinopathy</b>    | 9778  | 992 (10.15)  | 1.18 (1.11-1.25) | 0.91 (0.84-0.98) |
| <b>Pernicious Anaemia</b>      | 974   | 137 (14.07)  | 1.63 (1.38-1.93) | 0.91 (0.77-1.09) |
| <b>Vascular Dementia</b>       | 1148  | 148 (12.89)  | 1.00 (0.85-1.17) | 0.91 (0.75-1.10) |
| <b>Alzheimer's disease</b>     | 2214  | 250 (11.29)  | 0.93 (0.82-1.06) | 0.88 (0.74-1.04) |
| <b>Dementia Unspecified</b>    | 4901  | 574 (11.71)  | 0.98 (0.90-1.06) | 0.76 (0.67-0.86) |

\*Adjusted hazard ratios estimated using a Cox proportional hazards model, adjusting for age, sex, ethnic group, socioeconomic status, index year, vaccination status, symptoms recorded before COVID-19, and comorbidities.

COPD=chronic obstructive pulmonary disease, BPH=benign prostatic hyperplasia, SLE=systemic lupus erythematosus, IBS = irritable bowel syndrome, AIDS= acquired immune deficiency syndrome, IHD=ischaemic heart disease, PCOS=poly cystic ovarian syndrome, NAFLD=non-alcoholic fatty liver disease, VTE = venous thromboembolism, ADHD= attention deficit hyperactivity disorder, TIA=transient ischaemic attack, OSA=obstructive sleep apnoea, AF=atrial fibrillation, AMD=age-related macular degeneration, CKD=chronic kidney disease, PVD=peripheral vascular disease

Supplementary Table 7: Risk factors associated with the development of Long COVID (definition based on a composite of significantly different symptoms between patients infected with SARS CoV-2 and propensity matched comparator cohort of patients no recorded evidence of SARS CoV-2 infection)

| Risk factor                                | Sample size [N=384,137] | Long COVID symptoms [n=50,832] (7.78) n (%) | Unadjusted HR (95% CI) | Adjusted HR* (95% CI) |
|--------------------------------------------|-------------------------|---------------------------------------------|------------------------|-----------------------|
| <b>Sex</b>                                 |                         |                                             |                        |                       |
| <i>Men</i>                                 | 171593                  | 16477 (9.60)                                | Ref                    | Ref                   |
| <i>Women</i>                               | 212544                  | 34355 (16.16)                               | 1.72 (1.69-1.76)       | 1.47 (1.44-1.50)      |
| <b>Age (years)</b>                         |                         |                                             |                        |                       |
| <i>18-29</i>                               | 95969                   | 10937 (11.40)                               | Ref                    | Ref                   |
| <i>30 - 39</i>                             | 78302                   | 9495 (12.13)                                | 1.18 (1.15-1.21)       | 0.99 (0.96-1.02)      |
| <i>40 - 49</i>                             | 75349                   | 9716 (12.89)                                | 1.22 (1.19-1.25)       | 0.98 (0.95-1.01)      |
| <i>50 - 59</i>                             | 73262                   | 9900 (13.51)                                | 1.25 (1.22-1.28)       | 0.94 (0.91-0.97)      |
| <i>60 - 69</i>                             | 35932                   | 5239 (14.58)                                | 1.33 (1.29-1.37)       | 0.91 (0.87-0.94)      |
| <i>≥70</i>                                 | 25323                   | 5545 (21.90)                                | 1.70 (1.65-1.76)       | 0.94 (0.89-0.99)      |
| <b>Ethnicity</b>                           |                         |                                             |                        |                       |
| <i>White</i>                               | 246717                  | 34488 (13.98)                               | Ref                    | Ref                   |
| <i>Asians</i>                              | 47788                   | 6437 (13.47)                                | 0.91 (0.84-0.98)       | 0.97 (0.90-1.05)      |
| <i>Black</i>                               | 15846                   | 1883 (11.88)                                | 1.05 (0.97-1.13)       | 1.23 (1.14-1.33)      |
| <i>Mixed</i>                               | 5976                    | 695 (11.63)                                 | 1.04 (0.99-1.09)       | 1.10 (1.05-1.16)      |
| <i>Other</i>                               | 5438                    | 711 (13.07)                                 | 0.98 (0.96-1.01)       | 1.09 (1.06-1.13)      |
| <i>Missing</i>                             | 62372                   | 6618 (10.61)                                | 0.74 (0.72-0.76)       | 0.91 (0.89-0.94)      |
| <b>Body mass index (kg/m<sup>2</sup>)</b>  |                         |                                             |                        |                       |
| <i>&lt;18.5</i>                            | 10312                   | 1260 (12.22)                                | 0.91 (0.86-0.97)       | 0.94 (0.89-1.00)      |
| <i>18.5-25</i>                             | 117630                  | 14878 (12.65)                               | Ref                    | Ref                   |
| <i>25-30</i>                               | 109707                  | 14837 (13.52)                               | 1.09 (1.06-1.11)       | 1.07 (1.04-1.09)      |
| <i>&gt;30</i>                              | 95799                   | 15725 (16.41)                               | 1.33 (1.30-1.36)       | 1.12 (1.10-1.15)      |
| <i>Missing</i>                             | 50689                   | 4132 (8.15)                                 | 0.63 (0.61-0.65)       | 0.90 (0.87-0.94)      |
| <b>Smoking status</b>                      |                         |                                             |                        |                       |
| <i>Non-Smoker</i>                          | 141967                  | 16786 (11.82)                               | Ref                    | Ref                   |
| <i>Ex-Smoker</i>                           | 139294                  | 21076 (15.13)                               | 1.31 (1.28-1.34)       | 1.06 (1.04-1.09)      |
| <i>Current Smoker</i>                      | 85765                   | 11742 (13.69)                               | 1.26 (1.23-1.29)       | 1.08 (1.06-1.11)      |
| <i>Missing</i>                             | 17111                   | 1228 (7.18)                                 | 0.59 (0.55-0.62)       | 0.89 (0.84-0.95)      |
| <b>Socioeconomic status quintile (IMD)</b> |                         |                                             |                        |                       |
| <i>1 (least deprived)</i>                  | 66564                   | 7801 (11.72)                                | Ref                    | Ref                   |
| <i>2</i>                                   | 68657                   | 8478 (12.35)                                | 1.05 (1.02-1.08)       | 3.71 (3.60-3.82)      |
| <i>3</i>                                   | 70699                   | 9220 (13.04)                                | 1.13 (1.10-1.16)       | 1.00 (1.00-1.00)      |
| <i>4</i>                                   | 84002                   | 11176 (13.30)                               | 1.16 (1.13-1.20)       | 1.02 (0.99-1.05)      |
| <i>5 (most deprived)</i>                   | 87270                   | 13045 (14.95)                               | 1.25 (1.22-1.29)       | 1.05 (1.02-1.08)      |
| <i>Missing</i>                             | 6945                    | 1112 (16.01)                                | 1.30 (1.22-1.38)       | 1.05 (1.02-1.08)      |

|                                   |       |               |                  |                  |
|-----------------------------------|-------|---------------|------------------|------------------|
| Symptoms recorded before COVID-19 | 78880 | 19735 (25.02) | 2.41 (2.37-2.45) | 1.76 (1.73-1.79) |
| <b>Comorbidities</b>              |       |               |                  |                  |
| Systemic Sclerosis                | 116   | 26 (22.41)    | 2.05 (1.40-3.01) | 1.47 (1.00-2.16) |
| Anxiety                           | 77753 | 16684 (21.46) | 2.01 (1.98-2.05) | 1.38 (1.35-1.41) |
| Erectile Dysfunction              | 16678 | 2832 (16.98)  | 1.26 (1.21-1.31) | 1.34 (1.28-1.40) |
| Back pain                         | 5483  | 1334 (24.33)  | 2.00 (1.90-2.12) | 1.31 (1.24-1.39) |
| BPH                               | 4961  | 1031 (20.78)  | 1.47 (1.38-1.56) | 1.30 (1.22-1.39) |
| COPD                              | 8040  | 2380 (29.60)  | 2.22 (2.13-2.32) | 1.25 (1.19-1.30) |
| Learning Disability               | 3283  | 509 (15.50)   | 1.27 (1.16-1.39) | 1.24 (1.13-1.36) |
| Ankylosing Spondylitis            | 630   | 113 (17.94)   | 1.42 (1.18-1.71) | 1.24 (1.03-1.49) |
| Migraine                          | 43043 | 8714 (20.24)  | 1.71 (1.67-1.75) | 1.21 (1.18-1.24) |
| IBS                               | 27492 | 5924 (21.55)  | 1.76 (1.71-1.80) | 1.19 (1.16-1.22) |
| Fibromyalgia                      | 4031  | 1249 (30.98)  | 2.62 (2.47-2.77) | 1.19 (1.12-1.26) |
| Chronic Sinusitis                 | 6838  | 1462 (21.38)  | 1.64 (1.55-1.72) | 1.18 (1.12-1.24) |
| Endometriosis                     | 5727  | 1272 (22.21)  | 1.84 (1.74-1.94) | 1.18 (1.12-1.25) |
| Depression                        | 83903 | 17428 (20.77) | 1.97 (1.93-2.00) | 1.18 (1.15-1.21) |
| Osteoarthritis                    | 41007 | 8832 (21.54)  | 1.66 (1.63-1.70) | 1.18 (1.15-1.21) |
| Hepatitis C                       | 633   | 125 (19.75)   | 1.48 (1.24-1.76) | 1.17 (0.98-1.39) |
| All Chronic Liver Disease         | 10624 | 2248 (21.16)  | 1.70 (1.63-1.77) | 1.17 (1.10-1.25) |
| Falls                             | 28946 | 6556 (22.65)  | 1.69 (1.65-1.73) | 1.17 (1.14-1.21) |
| Coeliac Disease                   | 1669  | 323 (19.35)   | 1.45 (1.30-1.62) | 1.16 (1.04-1.30) |
| Autoimmune Skin Conditions        | 5200  | 845 (16.25)   | 1.26 (1.18-1.35) | 1.15 (1.07-1.23) |
| Low Hb                            | 20039 | 4365 (21.78)  | 1.74 (1.68-1.79) | 1.15 (1.11-1.18) |
| Substance Misuse                  | 6449  | 1227 (19.03)  | 1.59 (1.51-1.69) | 1.15 (1.08-1.22) |
| Multiple Sclerosis                | 791   | 154 (19.47)   | 1.43 (1.22-1.68) | 1.15 (0.98-1.35) |
| Hemiplegia                        | 512   | 108 (21.09)   | 1.37 (1.13-1.65) | 1.15 (0.95-1.40) |
| PCOS                              | 9599  | 1842 (19.19)  | 1.62 (1.54-1.69) | 1.14 (1.09-1.20) |
| ADHD                              | 1935  | 266 (13.75)   | 1.16 (1.03-1.30) | 1.14 (1.01-1.28) |
| Cluster Headache                  | 1359  | 277 (20.38)   | 1.62 (1.44-1.83) | 1.14 (1.01-1.29) |
| AIDS                              | 708   | 105 (14.83)   | 1.13 (0.93-1.37) | 1.14 (0.94-1.38) |
| VTE                               | 7035  | 1586 (22.54)  | 1.60 (1.52-1.68) | 1.13 (1.07-1.19) |
| Hay fever                         | 70648 | 11440 (16.19) | 1.33 (1.30-1.36) | 1.12 (1.10-1.15) |
| Coagulopathy                      | 4336  | 830 (19.14)   | 1.47 (1.38-1.58) | 1.12 (1.05-1.20) |
| Eating disorder                   | 3488  | 737 (21.13)   | 1.67 (1.55-1.79) | 1.12 (1.04-1.21) |
| SLE                               | 485   | 105 (21.65)   | 1.77 (1.46-2.14) | 1.12 (0.92-1.36) |
| Chronic Pancreatitis              | 276   | 73 (26.45)    | 1.84 (1.46-2.31) | 1.11 (0.88-1.40) |
| Arrhythmia                        | 24962 | 5490 (21.99)  | 1.53 (1.49-1.57) | 1.10 (1.07-1.14) |
| Haemorrhagic Stroke               | 985   | 203 (20.61)   | 1.37 (1.19-1.57) | 1.10 (0.96-1.26) |
| Deafness                          | 3767  | 857 (22.75)   | 1.58 (1.47-1.69) | 1.10 (1.02-1.18) |
| Diverticular Disease              | 10610 | 2452 (23.11)  | 1.67 (1.60-1.73) | 1.10 (1.06-1.15) |

|                                   |       |               |                  |                  |
|-----------------------------------|-------|---------------|------------------|------------------|
| <b>Polymyalgia Rheumatica</b>     | 1499  | 402 (26.82)   | 1.87 (1.69-2.06) | 1.10 (0.99-1.21) |
| <b>Asthma</b>                     | 76946 | 13430 (17.45) | 1.44 (1.42-1.47) | 1.10 (1.08-1.13) |
| <b>Acne</b>                       | 53994 | 7902 (14.63)  | 1.12 (1.10-1.15) | 1.09 (1.06-1.12) |
| <b>Peptic Ulcer</b>               | 4968  | 1114 (22.42)  | 1.57 (1.48-1.67) | 1.09 (1.03-1.16) |
| <b>Inflammatory Bowel Disease</b> | 3799  | 669 (17.61)   | 1.32 (1.22-1.43) | 1.09 (1.01-1.18) |
| <b>OSA</b>                        | 5538  | 1071 (19.34)  | 1.51 (1.43-1.61) | 1.09 (1.02-1.15) |
| <b>Blindness</b>                  | 1512  | 371 (24.54)   | 1.62 (1.46-1.79) | 1.08 (0.97-1.20) |
| <b>Inflammatory Eye Disease</b>   | 6528  | 1162 (17.80)  | 1.31 (1.23-1.38) | 1.08 (1.02-1.14) |
| <b>Eczema</b>                     | 75272 | 11698 (15.54) | 1.22 (1.20-1.25) | 1.07 (1.04-1.09) |
| <b>Alcohol Misuse</b>             | 19593 | 3264 (16.66)  | 1.25 (1.20-1.29) | 1.07 (1.03-1.11) |
| <b>Raynaud's</b>                  | 4241  | 801 (18.89)   | 1.45 (1.35-1.55) | 1.07 (0.98-1.17) |
| <b>Valvular Heart Disease</b>     | 4451  | 997 (22.40)   | 1.53 (1.44-1.63) | 1.06 (1.00-1.14) |
| <b>TIA</b>                        | 3052  | 759 (24.87)   | 1.65 (1.53-1.77) | 1.06 (0.98-1.14) |
| <b>Chronic Fatigue Syndrome</b>   | 1365  | 333 (24.40)   | 1.83 (1.65-2.04) | 1.06 (0.95-1.19) |
| <b>IHD</b>                        | 9837  | 2245 (22.82)  | 1.60 (1.53-1.67) | 1.05 (1.00-1.11) |
| <b>Ischaemic Stroke</b>           | 1624  | 398 (24.51)   | 1.56 (1.42-1.73) | 1.05 (0.95-1.17) |
| <b>Psoriasis</b>                  | 15764 | 2520 (15.99)  | 1.23 (1.19-1.28) | 1.05 (1.00-1.09) |
| <b>AMD</b>                        | 2347  | 603 (25.69)   | 1.64 (1.51-1.78) | 1.05 (0.96-1.14) |
| <b>Parkinson's disease</b>        | 638   | 147 (23.04)   | 1.37 (1.17-1.61) | 1.05 (0.89-1.23) |
| <b>Gout</b>                       | 10838 | 1769 (16.32)  | 1.15 (1.09-1.20) | 1.05 (1.00-1.10) |
| <b>Cardiomyopathy</b>             | 925   | 174 (18.81)   | 1.41 (1.21-1.63) | 1.04 (0.89-1.21) |
| <b>Cataract</b>                   | 11608 | 2712 (23.36)  | 1.59 (1.53-1.65) | 1.04 (0.99-1.09) |
| <b>Serious Mental Illness</b>     | 3891  | 895 (23.00)   | 1.61 (1.50-1.72) | 1.04 (0.98-1.12) |
| <b>Epilepsy</b>                   | 5842  | 984 (16.84)   | 1.26 (1.19-1.35) | 1.04 (0.98-1.11) |
| <b>Type 2 diabetes</b>            | 24500 | 4688 (19.13)  | 1.42 (1.38-1.46) | 1.04 (1.00-1.08) |
| <b>Hypertension</b>               | 56002 | 10151 (18.13) | 1.37 (1.34-1.40) | 1.03 (1.00-1.06) |
| <b>Hypothyroidism</b>             | 16202 | 3204 (19.78)  | 1.51 (1.46-1.57) | 1.03 (0.99-1.07) |
| <b>Heart failure</b>              | 2930  | 783 (26.72)   | 1.70 (1.58-1.82) | 1.02 (0.95-1.11) |
| <b>Myocardial Infarction</b>      | 4795  | 1007 (21.00)  | 1.43 (1.35-1.52) | 1.02 (0.95-1.10) |
| <b>NAFLD</b>                      | 4837  | 1039 (21.48)  | 1.77 (1.67-1.89) | 1.02 (0.94-1.11) |
| <b>AF</b>                         | 6557  | 1523 (23.23)  | 1.48 (1.41-1.56) | 1.01 (0.95-1.07) |
| <b>PVD</b>                        | 3426  | 715 (20.87)   | 1.53 (1.42-1.64) | 1.01 (0.92-1.10) |
| <b>Unspecified Stroke</b>         | 2576  | 629 (24.42)   | 1.52 (1.41-1.65) | 1.01 (0.93-1.10) |
| <b>Fragility Fracture</b>         | 35823 | 5510 (15.38)  | 1.10 (1.07-1.14) | 1.01 (0.98-1.04) |
| <b>Cancer</b>                     | 15856 | 2943 (18.56)  | 1.30 (1.25-1.35) | 1.00 (0.97-1.04) |
| <b>Congenital Heart Disease</b>   | 2374  | 363 (15.29)   | 1.14 (1.03-1.27) | 1.00 (0.90-1.12) |
| <b>Alcoholic Liver disease</b>    | 655   | 153 (23.36)   | 1.70 (1.45-1.99) | 1.00 (0.84-1.19) |
| <b>Alzheimer's disease</b>        | 2214  | 542 (24.48)   | 1.31 (1.21-1.43) | 1.00 (0.89-1.12) |
| <b>Hyperthyroidism</b>            | 4039  | 753 (18.64)   | 1.39 (1.29-1.49) | 1.00 (0.93-1.07) |



|                                |      |              |                  |                  |
|--------------------------------|------|--------------|------------------|------------------|
| <b>Glaucoma</b>                | 3694 | 739 (20.01)  | 1.37 (1.27-1.47) | 0.99 (0.92-1.07) |
| <b>Vascular Dementia</b>       | 1148 | 308 (26.83)  | 1.35 (1.20-1.51) | 0.99 (0.86-1.13) |
| <b>Chronic Kidney Disease</b>  | 9820 | 2319 (23.62) | 1.51 (1.45-1.58) | 0.99 (0.95-1.04) |
| <b>Other Pulmonary Disease</b> | 1888 | 477 (25.26)  | 1.73 (1.58-1.90) | 0.99 (0.90-1.09) |
| <b>Rheumatoid Arthritis</b>    | 3180 | 665 (20.91)  | 1.50 (1.39-1.62) | 0.98 (0.90-1.05) |
| <b>Type 1 diabetes</b>         | 2234 | 341 (15.26)  | 1.12 (1.00-1.24) | 0.98 (0.88-1.10) |
| <b>Diabetic Retinopathy</b>    | 9778 | 1893 (19.36) | 1.38 (1.32-1.45) | 0.97 (0.91-1.03) |
| <b>Aortic Aneurysm</b>         | 657  | 139 (21.16)  | 1.34 (1.13-1.58) | 0.96 (0.81-1.13) |
| <b>Pernicious Anaemia</b>      | 974  | 236 (24.23)  | 1.70 (1.50-1.94) | 0.95 (0.83-1.08) |
| <b>Hepatitis B</b>             | 1124 | 143 (12.72)  | 1.06 (0.90-1.25) | 0.93 (0.79-1.10) |
| <b>Sjogren's Syndrome</b>      | 433  | 95 (21.94)   | 1.68 (1.37-2.05) | 0.90 (0.73-1.10) |
| <b>Dementia Unspecified</b>    | 4901 | 1174 (23.95) | 1.29 (1.21-1.36) | 0.83 (0.76-0.92) |

\*Adjusted hazard ratios estimated using a Cox proportional hazards model, adjusting for age, sex, ethnic group, socioeconomic status, index year, vaccination status, symptoms recorded before COVID-19, and comorbidities.

IMD=Index of Multiple Deprivation, BPH=benign prostatic hyperplasia, COPD=chronic obstructive pulmonary disease, IBS = irritable bowel syndrome, PCOS=poly cystic ovarian syndrome, ADHD=attention deficit hyperactivity disorder, AIDS= acquired immune deficiency syndrome, VTE = venous thromboembolism, SLE=systemic lupus erythematosus, OSA=obstructive sleep apnoea, TIA=transient ischaemic attack, IHD=ischaemic heart disease, AMD=age-related macular degeneration, NAFLD=non-alcoholic fatty liver disease, AF=atrial fibrillation, PVD=peripheral vascular disease, CKD=chronic kidney disease

*Supplementary Table 8: Consolidation of 115 symptoms into 50 symptoms to be included as indicators in latent class analysis*

Consolidation of symptom codes were performed as follows

Step 1: Restriction to symptoms that were significantly associated with a history of SARS CoV-2 infection after 12 weeks of infection

Step 2: Consolidation of symptoms by combining or including symptoms:

- (a) that are likely to fall under a single umbrella of symptom,
- (b) that have mutually inclusive Snomed CT code lists,
- (c) that are likely to be presented similarly and thereby potentially misclassified

| Symptom                         | Consolidated Symptom             |
|---------------------------------|----------------------------------|
| Shortness of breath             | Shortness of breath (1)          |
| Shortness of breath at rest     |                                  |
| Shortness of breath on exertion |                                  |
| Tachypnoea                      |                                  |
| Wheezing                        | Wheezing (2)                     |
| Chest pain                      | Chest pain (3)                   |
| Pleuritic chest pain            |                                  |
| Limb swelling                   | Limb swelling (4)                |
| Palpitations                    | Palpitations / Tachycardia (5)   |
| Tachycardia                     |                                  |
| Presyncope                      | Presyncope / dizziness (6)       |
| Dizziness                       |                                  |
| Fatigue                         | Fatigue / asthenia (7)           |
| Post exertional fatigue         |                                  |
| Asthenia                        |                                  |
| Neurasthenia                    |                                  |
| Amnesia                         | Cognitive problems (8)           |
| Brain fog                       |                                  |
| Difficulty understanding        |                                  |
| Reading difficulty              |                                  |
| Insomnia                        | Insomnia (9)                     |
| Anosmia                         | Anosmia (10)                     |
| Cough                           | Cough (11)                       |
| Dysphagia                       | Dysphagia (12)                   |
| Ear pain                        | Ear pain (13)                    |
| Hoarse voice                    | Hoarse voice (14)                |
| Nasal congestion                | Nasal congestion / Sneezing (15) |
| Sneezing                        |                                  |
| Phlegm                          | Phlegm (16)                      |
| Abdominal pain                  | Abdominal pain (17)              |
| Bloating                        | Bloating (18)                    |
| Bowel incontinence              | Bowel incontinence (19)          |
| Constipation                    | Constipation (20)                |

|                        |                             |
|------------------------|-----------------------------|
| Diarrhoea              | Diarrhoea (21)              |
| Gastric reflux         | Gastric reflux (22)         |
| gastritis              |                             |
| Nausea                 | Nausea / Vomiting (23)      |
| Vomiting               |                             |
| Weight loss            | Weight loss (24)            |
| Joint pain             | Joint pain (25)             |
| Paraesthesia           | Paraesthesia (26)           |
| Anorexia               | Anorexia (27)               |
| Anhedonia              | Anxiety / depression (28)   |
| Anxiety                |                             |
| Anxiety and depression |                             |
| Depression             |                             |
| Dry and scaly skin     | Dry and scaly skin (29)     |
| Hair loss              | Hair loss (30)              |
| Hives                  | Hives / Itchy skin (31)     |
| Itchy skin             |                             |
| Nail changes           | Nail changes (32)           |
| Purpura                | Purpura / rash (33)         |
| Rash                   |                             |
| Dry eye                | Dry eye (34)                |
| Red eye                | Red/ watery eye (35)        |
| Watery eyes            |                             |
| Ejaculation difficulty | Sexual dysfunction (36)     |
| Erectile dysfunction   |                             |
| Anorgasm               |                             |
| Reduced libido         |                             |
| Menorrhagia            | Menorrhagia (37)            |
| Vaginal discharge      | Vaginal discharge (38)      |
| Allergies              | Allergies / angioedema (39) |
| Angioedema             |                             |
| Body ache              | Body ache (40)              |
| Chills and shivering   | Chills and fever (41)       |
| Fever                  |                             |
| Dry mouth              | Dry mouth (42)              |
| Haemoptysis            | Haemoptysis (43)            |
| Headache               | Headache (44)               |
| Hot flushes            | Hot flushes (45)            |
| Mouth ulcer            | Mouth ulcer (46)            |
| Polyuria               | Polyuria (47)               |
| Urinary incontinence   | Urinary incontinence (48)   |
| Urinary retention      | Urinary retention (49)      |
| Vertigo                | Vertigo (0)                 |

Supplementary Table 9A: Predicted latent class membership (model posterior probability)

| Class   | Dominant symptoms within the class                          | Predicted class membership |
|---------|-------------------------------------------------------------|----------------------------|
| Class 1 | Broad spectrum of symptoms including pain, fatigue and rash | 80.0%                      |
| Class 2 | Cough, shortness of breath and phlegm                       | 5.8%                       |
| Class 3 | Anxiety, depression and brain fog                           | 14.2%                      |

Supplementary Table 9B: item-response probabilities ( $\rho$ ) of the symptom items conditional on latent class membership

| Symptoms (Items)          | Rho ( $\rho$ ): item-response probabilities conditional on latent class membership |         |         |
|---------------------------|------------------------------------------------------------------------------------|---------|---------|
|                           | Class 1                                                                            | Class 2 | Class 3 |
| Shortness of breath       | 0.0308                                                                             | 0.2881  | 0.0034  |
| Wheezing                  | 0.0033                                                                             | 0.1409  | 0.0000  |
| Chest pain                | 0.0564                                                                             | 0.0351  | 0.0081  |
| Limb swelling             | 0.0221                                                                             | 0.0197  | 0.0010  |
| Palpitations              | 0.0268                                                                             | 0.0069  | 0.0057  |
| Presyncope/dizziness      | 0.0247                                                                             | 0.0107  | 0.0036  |
| Fatigue                   | 0.0585                                                                             | 0.0318  | 0.0190  |
| Cognitive problems        | 0.0038                                                                             | 0.0054  | 0.0443  |
| Insomnia                  | 0.0149                                                                             | 0.0065  | 0.0571  |
| Anosmia                   | 0.0044                                                                             | 0.0072  | 0.0007  |
| Cough                     | 0.0211                                                                             | 0.7103  | 0.0043  |
| Dysphagia                 | 0.0100                                                                             | 0.0074  | 0.0006  |
| Ear pain                  | 0.0196                                                                             | 0.0049  | 0.0040  |
| Hoarse voice              | 0.0036                                                                             | 0.0055  | 0.0004  |
| Nasal congestion/sneezing | 0.0129                                                                             | 0.0152  | 0.0014  |
| Phlegm                    | 0.0001                                                                             | 0.1989  | 0.0000  |
| Abdominal pain            | 0.0818                                                                             | 0.0145  | 0.0093  |
| Bloating                  | 0.0090                                                                             | 0.0013  | 0.0006  |
| Bowel incontinence        | 0.0053                                                                             | 0.0013  | 0.0000  |
| Constipation              | 0.0252                                                                             | 0.0110  | 0.0037  |
| Diarrhoea                 | 0.0222                                                                             | 0.0126  | 0.0045  |
| Gastric reflux            | 0.0193                                                                             | 0.0168  | 0.0070  |
| Nausea/vomiting           | 0.0179                                                                             | 0.0105  | 0.0030  |
| Weight loss               | 0.0088                                                                             | 0.0034  | 0.0025  |
| Joint pain                | 0.0227                                                                             | 0.0032  | 0.0039  |
| Paraesthesia              | 0.0139                                                                             | 0.0047  | 0.0011  |
| Anxiety/depression        | 0.0470                                                                             | 0.0459  | 1.0000  |

|                      |        |        |        |
|----------------------|--------|--------|--------|
| Anorexia             | 0.0040 | 0.0052 | 0.0066 |
| Dry/scaly skin       | 0.0062 | 0.0000 | 0.0002 |
| Hair loss            | 0.0303 | 0.0026 | 0.0039 |
| Hives/itchy skin     | 0.0136 | 0.0099 | 0.0020 |
| Nail changes         | 0.0105 | 0.0019 | 0.0006 |
| Purpura/rash         | 0.0500 | 0.0154 | 0.0046 |
| Dry eye              | 0.0065 | 0.0010 | 0.0004 |
| Red/watery eye       | 0.0116 | 0.0014 | 0.0001 |
| Sexual dysfunction   | 0.0118 | 0.0008 | 0.0022 |
| Menorrhagia          | 0.0174 | 0.0027 | 0.0036 |
| Vaginal discharge    | 0.0319 | 0.0077 | 0.0030 |
| Allergies/angioedema | 0.0282 | 0.0204 | 0.0033 |
| Body ache            | 0.0055 | 0.0018 | 0.0007 |
| Fever/Chills         | 0.0096 | 0.0231 | 0.0007 |
| Dry mouth            | 0.0020 | 0.0018 | 0.0005 |
| Haemoptysis          | 0.0015 | 0.0078 | 0.0003 |
| Headache             | 0.0861 | 0.0465 | 0.0170 |
| Hot flushes          | 0.0049 | 0.0008 | 0.0019 |
| Mouth ulcer          | 0.0041 | 0.0009 | 0.0009 |
| Polyuria             | 0.0166 | 0.0070 | 0.0015 |
| Urinary incontinence | 0.0150 | 0.0076 | 0.0016 |
| Urinary retention    | 0.0035 | 0.0000 | 0.0004 |
| Vertigo              | 0.0143 | 0.0022 | 0.0001 |

Supplementary Table 10: Baseline characteristics of patients with SARS CoV-2 infection, without persistent symptoms and with persistent symptoms and membership to three latent classes

|                             | Patients without persistent symptoms | Latent Classes among those with persistent symptoms associated with SARS CoV-2 infection (n=50,832) |                                                    |                                                        |
|-----------------------------|--------------------------------------|-----------------------------------------------------------------------------------------------------|----------------------------------------------------|--------------------------------------------------------|
|                             |                                      | Class 1<br>(Broad spectrum of symptoms including pain, fatigue and rash)                            | Class 2<br>(Cough, shortness of breath and phlegm) | Class 3<br>(Anxiety, depression, insomnia & brain fog) |
| <b>Number of patients</b>   | <b>(n=333,305)</b>                   | <b>(n=40,676)<br/>(80.0%)</b>                                                                       | <b>(n=2,928)<br/>(5.8%)</b>                        | <b>(n=7,228)<br/>(14.2%)</b>                           |
| <b>Age at index (years)</b> |                                      |                                                                                                     |                                                    |                                                        |
| <b>Mean (SD)</b>            | 43.1 (16.2)                          | 47.3 (17.9)                                                                                         | 53.5 (18.8)                                        | 38.2 (15.1)                                            |
| <b>Median (IQR)</b>         | 41.0 (29.0 ; 54.0)                   | 46.0 (33.0 ; 58.0)                                                                                  | 53.0 (39.0 ; 65.0)                                 | 35.0 (25.0 ; 48.0)                                     |
| <b>Categories, n (%)</b>    |                                      |                                                                                                     |                                                    |                                                        |
| <b>18-29</b>                | 85032 (25.5)                         | 7932 (19.5)                                                                                         | 378 (12.9)                                         | 2627 (36.3)                                            |
| <b>30-39</b>                | 68807 (20.6)                         | 7465 (18.3)                                                                                         | 412 (14.1)                                         | 1618 (22.4)                                            |
| <b>40-49</b>                | 65633 (19.7)                         | 7874 (19.4)                                                                                         | 497 (17.0)                                         | 1345 (18.6)                                            |
| <b>50-59</b>                | 63362 (19.0)                         | 8222 (20.2)                                                                                         | 649 (22.2)                                         | 1029 (14.2)                                            |
| <b>60-69</b>                | 30693 (9.2)                          | 4447 (10.9)                                                                                         | 413 (14.1)                                         | 379 (5.2)                                              |
| <b>70+</b>                  | 19778 (5.9)                          | 4736 (11.6)                                                                                         | 579 (19.8)                                         | 230 (3.2)                                              |
| <b>Sex, n (%)</b>           |                                      |                                                                                                     |                                                    |                                                        |
| <b>Female</b>               | 178189 (53.46)                       | 27446 (67.5)                                                                                        | 1817 (62.1)                                        | 5092 (70.4)                                            |
| <b>Male</b>                 | 155116 (46.54)                       | 13230 (32.5)                                                                                        | 1111 (37.9)                                        | 2136 (29.6)                                            |
| <b>Ethnicity, n (%)</b>     |                                      |                                                                                                     |                                                    |                                                        |
| <b>White</b>                | 212229 (63.7)                        | 27138 (66.7)                                                                                        | 2108 (72.0)                                        | 5242 (72.5)                                            |
| <b>Asians</b>               | 41351 (12.4)                         | 5574 (13.7)                                                                                         | 347 (11.8)                                         | 516 (7.1)                                              |

|                                       |               |              |             |             |
|---------------------------------------|---------------|--------------|-------------|-------------|
| <b>Black</b>                          | 13963 (4.2)   | 1629 (4.0)   | 67 (2.3)    | 187 (2.6)   |
| <b>Mixed</b>                          | 5281 (1.6)    | 557 (1.4)    | 32 (1.1)    | 106 (1.5)   |
| <b>Others</b>                         | 4727 (1.4)    | 625 (1.5)    | 25 (0.8)    | 61 (0.8)    |
| <b>Missing</b>                        | 55754 (16.7)  | 5153 (12.7)  | 349 (11.9)  | 1116 (15.4) |
| <b>Socio-economic status IMD</b>      |               |              |             |             |
| <b>quintile, n (%)</b>                |               |              |             |             |
| <b>Quintile 1 (Least deprived)</b>    | 58763 (17.6)  | 6398 (15.7)  | 392 (13.4)  | 1011 (14.0) |
| <b>Quintile 2</b>                     | 60179 (18.1)  | 6812 (16.7)  | 444 (15.2)  | 1222 (16.9) |
| <b>Quintile 3</b>                     | 61479 (18.4)  | 7341 (18.1)  | 579 (19.8)  | 1300 (18.0) |
| <b>Quintile 4</b>                     | 72826 (21.9)  | 8873 (21.8)  | 649 (22.2)  | 1654 (22.9) |
| <b>Quintile 5 (Most deprived)</b>     | 74225 (22.3)  | 10323 (25.4) | 803 (27.4)  | 1919 (26.5) |
| <b>Missing</b>                        | 5833 (1.7)    | 929 (2.3)    | 61 (2.0)    | 122 (1.7)   |
| <b>Body mass index (kg/m2), n (%)</b> |               |              |             |             |
| <b>&lt;18.5</b>                       | 9052 (2.7)    | 965 (2.4)    | 75 (2.6)    | 220 (3.0)   |
| <b>18.5-24</b>                        | 102752 (30.8) | 11824 (29.1) | 730 (24.9)  | 2324 (32.1) |
| <b>25-29</b>                          | 94870 (28.5)  | 12114 (29.8) | 881 (30.1)  | 1842 (25.5) |
| <b>30+</b>                            | 80074 (24.0)  | 12639 (31.1) | 1068 (36.5) | 2018 (27.9) |
| <b>Missing</b>                        | 46557 (14.0)  | 3134 (7.7)   | 174 (5.9)   | 824 (11.4)  |
| <b>Smoking status</b>                 |               |              |             |             |
| <b>Never smoked</b>                   | 125181 (37.6) | 13632 (33.5) | 758 (25.9)  | 2396 (33.1) |
| <b>Ex-smoker</b>                      | 118218 (35.5) | 17076 (42.0) | 1358 (46.4) | 2642 (36.6) |
| <b>Current smoker</b>                 | 74023 (22.2)  | 9060 (22.3)  | 769 (26.3)  | 1913 (26.5) |
| <b>Missing</b>                        | 15883 (4.8)   | 908 (2.2)    | 43 (1.5)    | 277 (3.8)   |

Supplementary Table 11: Results of the multinomial logistic regression model for the polytomous class membership outcome

|                                           | Patients without persistent symptoms | Adjusted OR (95% CI) for each of the latent classes                      |                                                    |                                                        |
|-------------------------------------------|--------------------------------------|--------------------------------------------------------------------------|----------------------------------------------------|--------------------------------------------------------|
|                                           |                                      | Class 1<br>(Broad spectrum of symptoms including pain, fatigue and rash) | Class 2<br>(Cough, shortness of breath and phlegm) | Class 3<br>(Anxiety, depression, insomnia & brain fog) |
| <b>Number of patients</b>                 | <b>(n=333,305)</b>                   | <b>(n=40,676)</b>                                                        | <b>(n=2,928)</b>                                   | <b>(n=7,228)</b>                                       |
| <b>Age at index (years)</b>               |                                      |                                                                          |                                                    |                                                        |
| <b>18-29</b>                              |                                      | Ref                                                                      | Ref                                                | Ref                                                    |
| <b>30-39</b>                              |                                      | 1.01 (0.97-1.04)                                                         | 1.11 (0.96-1.28)                                   | 0.67 (0.63-0.72)                                       |
| <b>40-49</b>                              |                                      | 1.09 (1.05-1.13)                                                         | 1.37 (1.19-1.57)                                   | 0.58 (0.54-0.63)                                       |
| <b>50-59</b>                              |                                      | 1.17 (1.13-1.22)                                                         | 1.81 (1.58-2.07)                                   | 0.44 (0.41-0.48)                                       |
| <b>60-69</b>                              |                                      | 1.31 (1.26-1.37)                                                         | 2.32 (2-2.69)                                      | 0.34 (0.3-0.38)                                        |
| <b>70+</b>                                |                                      | 2.16 (2.07-2.25)                                                         | 5.12 (4.46-5.88)                                   | 0.3 (0.27-0.35)                                        |
| <b>Sex</b>                                |                                      |                                                                          |                                                    |                                                        |
| <b>Male</b>                               |                                      | Ref                                                                      | Ref                                                | Ref                                                    |
| <b>Female</b>                             |                                      | 1.76 (1.72-1.8)                                                          | 1.41 (1.3-1.52)                                    | 1.93 (1.83-2.04)                                       |
| <b>Ethnicity</b>                          |                                      |                                                                          |                                                    |                                                        |
| <b>White</b>                              |                                      | Ref                                                                      | Ref                                                | Ref                                                    |
| <b>Asians</b>                             |                                      | 1.15 (1.12-1.19)                                                         | 1 (0.89-1.13)                                      | 0.49 (0.45-0.54)                                       |
| <b>Black</b>                              |                                      | 0.9 (0.85-0.95)                                                          | 0.48 (0.38-0.62)                                   | 0.48 (0.41-0.55)                                       |
| <b>Mixed</b>                              |                                      | 0.89 (0.82-0.98)                                                         | 0.75 (0.53-1.07)                                   | 0.69 (0.57-0.84)                                       |
| <b>Others</b>                             |                                      | 1.15 (1.06-1.25)                                                         | 0.65 (0.44-0.97)                                   | 0.49 (0.38-0.64)                                       |
| <b>Missing</b>                            |                                      | 0.89 (0.86-0.92)                                                         | 0.87 (0.78-0.98)                                   | 0.83 (0.77-0.89)                                       |
| <b>Socio-economic status IMD quintile</b> |                                      |                                                                          |                                                    |                                                        |
| <b>Quintile 1 (Least deprived)</b>        |                                      | Ref                                                                      | Ref                                                | Ref                                                    |
| <b>Quintile 2</b>                         | Ref                                  | 1.03 (0.99-1.06)                                                         | 1.09 (0.95-1.25)                                   | 1.15 (1.06-1.25)                                       |



|                                   |                  |                  |                  |
|-----------------------------------|------------------|------------------|------------------|
| <b>Quintile 3</b>                 | 1.07 (1.03-1.11) | 1.41 (1.24-1.6)  | 1.2 (1.11-1.31)  |
| <b>Quintile 4</b>                 | 1.1 (1.06-1.13)  | 1.38 (1.21-1.56) | 1.29 (1.19-1.39) |
| <b>Quintile 5 (Most deprived)</b> | 1.24 (1.2-1.28)  | 1.68 (1.48-1.9)  | 1.45 (1.34-1.57) |
| <b>Missing</b>                    | 1.42 (1.32-1.53) | 1.6 (1.22-2.1)   | 1.18 (0.98-1.43) |
| <b>Body mass index (kg/m2)</b>    |                  |                  |                  |
| <b>&lt;18.5</b>                   | 1 (0.93-1.07)    | 1.34 (1.05-1.7)  | 0.99 (0.86-1.14) |
| <b>18.5-24</b>                    | Ref              | Ref              | Ref              |
| <b>25-29</b>                      | 1.11 (1.08-1.15) | 1.16 (1.05-1.29) | 1.07 (1.01-1.14) |
| <b>30+</b>                        | 1.31 (1.27-1.34) | 1.59 (1.44-1.75) | 1.29 (1.21-1.37) |
| <b>Missing</b>                    | 0.82 (0.79-0.86) | 0.84 (0.71-1.01) | 0.88 (0.8-0.96)  |
| <b>Smoking Status</b>             |                  |                  |                  |
| <b>Never smoked</b>               | Ref              | Ref              | Ref              |
| <b>Ex-smoker</b>                  | 1.18 (1.15-1.21) | 1.43 (1.3-1.57)  | 1.25 (1.18-1.32) |
| <b>Current smoker</b>             | 1.11 (1.08-1.14) | 1.56 (1.41-1.73) | 1.35 (1.27-1.43) |
| <b>Missing</b>                    | 0.8 (0.75-0.87)  | 0.83 (0.6-1.15)  | 0.89 (0.77-1.02) |

Supplementary Table 12A: Snomed CT codes for confirmed COVID-19

| DESCRIPTION                                                                                                                             | SNOMED CT CODE   |
|-----------------------------------------------------------------------------------------------------------------------------------------|------------------|
| Detection of 2019 novel coronavirus using polymerase chain reaction technique                                                           | 1240511000000100 |
| Detection of 2019-nCoV (novel coronavirus) using polymerase chain reaction technique                                                    | 1240511000000100 |
| Detection of SARS-CoV-2 (severe acute respiratory syndrome coronavirus 2) using polymerase chain reaction technique                     | 1240511000000100 |
| Detection of Wuhan 2019-nCoV (novel coronavirus) using polymerase chain reaction technique                                              | 1240511000000100 |
| Wuhan 2019-nCoV (novel coronavirus) detected                                                                                            | 1240581000000100 |
| 2019-nCoV (novel coronavirus) detected                                                                                                  | 1240581000000100 |
| 2019 novel coronavirus detected                                                                                                         | 1240581000000100 |
| SARS-CoV-2 (severe acute respiratory syndrome coronavirus 2) detected                                                                   | 1240581000000100 |
| SARS-CoV-2 (severe acute respiratory syndrome coronavirus 2) detection result positive                                                  | 1240581000000100 |
| SARS-CoV-2 (severe acute respiratory syndrome coronavirus 2) RNA (ribonucleic acid) detection result positive                           | 1240581000000100 |
| COVID-19 detected                                                                                                                       | 1240581000000100 |
| COVID-19 confirmed by laboratory test                                                                                                   | 1300721000000100 |
| SARS-CoV-2 (severe acute respiratory syndrome coronavirus 2) RNA (ribonucleic acid) qualitative existence in specimen                   | 1321301000000100 |
| SARS-CoV-2 (severe acute respiratory syndrome coronavirus 2) antigen detection result positive                                          | 1322781000000100 |
| 2019-nCoV (novel coronavirus) antigen detection result positive                                                                         | 1322781000000100 |
| SARS-CoV-2 (severe acute respiratory syndrome coronavirus 2) RNA (ribonucleic acid) detection result positive                           | 1324601000000100 |
| 2019-nCoV (novel coronavirus) ribonucleic acid detected                                                                                 | 1324601000000100 |
| SARS-CoV-2 (severe acute respiratory syndrome coronavirus 2) RNA (ribonucleic acid) detection result positive at the limit of detection | 1324881000000100 |
| 2019-nCoV (novel coronavirus) detection result positive at the limit of detection                                                       | 1324881000000100 |
| Detection of SARS-CoV-2 (severe acute respiratory syndrome coronavirus 2) antigen                                                       | 871553007        |
| Detection of ribonucleic acid of 2019 novel coronavirus in nasopharyngeal swab                                                          | 871556004        |
| Detection of RNA (ribonucleic acid) of SARS-CoV-2 (severe acute respiratory syndrome coronavirus 2) in nasopharyngeal swab              | 871556004        |
| Detection of RNA (ribonucleic acid) of SARS-CoV-2 (severe acute respiratory syndrome coronavirus 2) in oropharyngeal swab               | 871557008        |
| Detection of RNA (ribonucleic acid) of SARS-CoV-2 (severe acute respiratory syndrome coronavirus 2) using polymerase chain reaction     | 871560001        |
| Detection of ribonucleic acid of COVID-19 using polymerase chain reaction                                                               | 871560001        |

Supplementary Table 12B: Snomed CT codes for suspected COVID-19

| DESCRIPTION                                                                                              | SNOMED CT CODE    |
|----------------------------------------------------------------------------------------------------------|-------------------|
| Suspected disease caused by Wuhan 2019-nCoV (novel coronavirus)                                          | 1240761000000100  |
| Myocarditis caused by 2019 novel coronavirus                                                             | 1240531000000100  |
| Disease caused by 2019 novel coronavirus                                                                 | 1240751000000100  |
| Otitis media caused by Wuhan 2019-nCoV (novel coronavirus)                                               | 1240521000000100  |
| Upper respiratory tract infection caused by 2019-nCoV (novel coronavirus)                                | 1240541000000100  |
| Otitis media caused by 2019 novel coronavirus                                                            | 1240521000000100  |
| Disease caused by Wuhan 2019-nCoV (novel coronavirus)                                                    | 1240751000000100  |
| Pneumonia caused by 2019 novel coronavirus                                                               | 1240551000000100  |
| Telephone consultation for suspected 2019-nCoV (novel coronavirus)                                       | 1240451000000100  |
| Gastroenteritis caused by Wuhan 2019-nCoV (novel coronavirus)                                            | 1240571000000100  |
| Telephone consultation for suspected Wuhan 2019-nCoV (novel coronavirus)                                 | 1240451000000100  |
| Upper respiratory tract infection caused by Wuhan 2019-nCoV (novel coronavirus)                          | 1240541000000100  |
| Encephalopathy caused by Wuhan 2019-nCoV (novel coronavirus)                                             | 1240561000000100  |
| Myocarditis caused by 2019-nCoV (novel coronavirus)                                                      | 1240531000000100  |
| Pneumonia caused by Wuhan 2019-nCoV (novel coronavirus)                                                  | 1240551000000100  |
| Encephalopathy caused by 2019-nCoV (novel coronavirus)                                                   | 1240561000000100  |
| Confirmed 2019-nCoV (novel coronavirus) infection                                                        | 12802201000006100 |
| Pneumonia caused by SARS-CoV-2 (severe acute respiratory syndrome coronavirus 2)                         | 1240551000000100  |
| Gastroenteritis caused by SARS-CoV-2 (severe acute respiratory syndrome coronavirus 2)                   | 1240571000000100  |
| Possible COVID-19                                                                                        | 1240761000000100  |
| Probable COVID-19 confirmed using clinical diagnostic criteria                                           | 1300731000000100  |
| Myocarditis caused by SARS-CoV-2 (severe acute respiratory syndrome coronavirus 2)                       | 1240531000000100  |
| Suspected COVID-19 caused by SARS-CoV-2 (severe acute respiratory syndrome coronavirus 2)                | 1240761000000100  |
| Telephone consultation for suspected SARS-CoV-2 (severe acute respiratory syndrome coronavirus 2)        | 1240451000000100  |
| COVID-19 confirmed clinically                                                                            | 1300731000000100  |
| Otitis media caused by SARS-CoV-2 (severe acute respiratory syndrome coronavirus 2)                      | 1240521000000100  |
| Upper respiratory tract infection caused by SARS-CoV-2 (severe acute respiratory syndrome coronavirus 2) | 1240541000000100  |
| Telephone consultation for suspected 2019 novel coronavirus                                              | 1240451000000100  |
| Disease caused by 2019-nCoV (novel coronavirus)                                                          | 1240751000000100  |
| COVID-19 severity score                                                                                  | 1300631000000100  |
| COVID-19 confirmed using clinical diagnostic criteria                                                    | 1300731000000100  |
| Myocarditis caused by Wuhan 2019-nCoV (novel coronavirus)                                                | 1240531000000100  |
| Suspected disease caused by 2019-nCoV (novel coronavirus)                                                | 1240761000000100  |
| Infection of upper respiratory tract caused by 2019 novel coronavirus                                    | 1240541000000100  |
| Gastroenteritis caused by 2019 novel coronavirus                                                         | 1240571000000100  |
| Suspected COVID-19                                                                                       | 1240761000000100  |
| Signposting to CHMS (COVID-19 Home Management Service)                                                   | 1321231000000100  |

|                                                                                                                           |                    |
|---------------------------------------------------------------------------------------------------------------------------|--------------------|
| COVID-19                                                                                                                  | 1240751000000100   |
| Encephalopathy caused by SARS-CoV-2 (severe acute respiratory syndrome coronavirus 2)                                     | 1240561000000100   |
| SARS-CoV infection                                                                                                        | 398447004          |
| Otitis media caused by 2019-nCoV (novel coronavirus)                                                                      | 1240521000000100   |
| Gastroenteritis caused by 2019-nCoV (novel coronavirus)                                                                   | 1240571000000100   |
| Suspected disease caused by 2019 novel coronavirus                                                                        | 1240761000000100   |
| Pneumonia caused by 2019-nCoV (novel coronavirus)                                                                         | 1240551000000100   |
| Encephalopathy caused by 2019 novel coronavirus                                                                           | 1240561000000100   |
| Suspected 2019-nCoV (novel coronavirus) infection                                                                         | 12802181000006100  |
| COVID-19 caused by SARS-CoV-2 (severe acute respiratory syndrome coronavirus 2)                                           | 1240751000000100   |
| 2019-nCoV (novel coronavirus) IgG detected                                                                                | 1321541000000100   |
| 2019-nCoV (novel coronavirus) IgA detected                                                                                | 1321761000000100   |
| 2019-nCoV (novel coronavirus) antibody detection result positive                                                          | 1322871000000100   |
| SARS-CoV-2 (severe acute respiratory syndrome coronavirus 2) antibody detection result positive                           | 1322871000000100   |
| SARS-CoV-2 (severe acute respiratory syndrome coronavirus 2) IgA detection result positive                                | 1321761000000100   |
| Serotype SARS-CoV-2 (severe acute respiratory syndrome coronavirus 2)                                                     | 1240421000000100   |
| Pneumonia caused by SARS-CoV-2 (severe acute respiratory syndrome coronavirus 2)                                          | 882784691000119000 |
| Disease caused by 2019-nCoV                                                                                               | 840539006          |
| Pneumonia caused by 2019 novel coronavirus                                                                                | 882784691000119000 |
| Infection of upper respiratory tract caused by 2019 novel coronavirus                                                     | 1240541000000100   |
| Encephalopathy due to COVID-19                                                                                            | 1240561000000100   |
| Myocarditis due to disease caused by SARS-CoV-2 (severe acute respiratory syndrome coronavirus 2)                         | 1240531000000100   |
| Otitis media due to COVID-19                                                                                              | 1240521000000100   |
| Encephalopathy due to disease caused by SARS-CoV-2 (severe acute respiratory syndrome coronavirus 2)                      | 1240561000000100   |
| Detection of SARS-CoV-2 (severe acute respiratory syndrome coronavirus 2)                                                 | 871562009          |
| Lymphopenia due to COVID-19                                                                                               | 866151004          |
| Suspected COVID-19                                                                                                        | 840544004          |
| COVID-19 lower respiratory infection                                                                                      | 880529761000119000 |
| Fever caused by SARS-CoV-2 (severe acute respiratory syndrome coronavirus 2)                                              | 119751000146104    |
| Lymphocytopenia due to SARS-CoV-2 (severe acute respiratory syndrome coronavirus 2)                                       | 866151004          |
| Acute respiratory distress syndrome due to disease caused by SARS-CoV-2 (severe acute respiratory syndrome coronavirus 2) | 674814021000119000 |
| Detection of SARS-CoV-2 (severe acute respiratory syndrome coronavirus 2) antibody                                        | 871552002          |
| SARS-CoV-2 (severe acute respiratory syndrome coronavirus 2) IgG detection result positive                                | 1321541000000100   |
| Myocarditis due to COVID-19                                                                                               | 1240531000000100   |
| Pneumonia caused by 2019-nCoV (novel coronavirus)                                                                         | 882784691000119000 |
| Disease caused by 2019 novel coronavirus                                                                                  | 840539006          |
| COVID-19 pneumonia                                                                                                        | 882784691000119000 |

|                                                                                                                           |                    |
|---------------------------------------------------------------------------------------------------------------------------|--------------------|
| Dyspnoea caused by SARS-CoV-2 (severe acute respiratory syndrome coronavirus 2)                                           | 119981000146107    |
| Detection of COVID-19                                                                                                     | 871562009          |
| Signposting to Your COVID Recovery                                                                                        | 1325021000000100   |
| Serotype 2019-nCoV (novel coronavirus)                                                                                    | 1240421000000100   |
| Suspected disease caused by 2019-nCoV (novel coronavirus)                                                                 | 840544004          |
| Suspected disease caused by 2019 novel coronavirus                                                                        | 840544004          |
| Sepsis due to disease caused by COVID-19                                                                                  | 870588003          |
| COVID-19 acute bronchitis                                                                                                 | 138389411000119000 |
| Detection of 2019 novel coronavirus antibody                                                                              | 871552002          |
| COVID-19                                                                                                                  | 840539006          |
| Acute COVID-19 infection                                                                                                  | 1325171000000100   |
| Sepsis due to disease caused by SARS-CoV-2 (severe acute respiratory syndrome coronavirus 2)                              | 870588003          |
| Lower respiratory infection caused by SARS-CoV-2 (severe acute respiratory syndrome coronavirus 2)                        | 880529761000119000 |
| COVID-19 acute respiratory distress syndrome                                                                              | 674814021000119000 |
| Ongoing symptomatic COVID-19                                                                                              | 1325181000000100   |
| Asymptomatic SARS-CoV-2 (severe acute respiratory syndrome coronavirus 2) infection                                       | 189486241000119000 |
| Suspected disease caused by SARS-CoV-2 (severe acute respiratory syndrome coronavirus 2)                                  | 840544004          |
| SARS-CoV-2 (severe acute respiratory syndrome coronavirus 2) IgG qualitative existence in specimen                        | 1321321000000100   |
| SARS-CoV-2 (severe acute respiratory syndrome coronavirus 2) IgM detection result positive                                | 1321551000000100   |
| Cardiomyopathy due to disease caused by SARS-CoV-2 (severe acute respiratory syndrome coronavirus 2)                      | 119731000146105    |
| Acute hypoxemic respiratory failure due to disease caused by SARS-CoV-2 (severe acute respiratory syndrome coronavirus 2) | 870590002          |
| Asymptomatic COVID-19                                                                                                     | 189486241000119000 |
| Anti-SARS-CoV-2 IgG                                                                                                       | 870361009          |
| Antibody to SARS-CoV-2 (severe acute respiratory syndrome coronavirus 2)                                                  | 1240401000000100   |
| Otitis media due to disease caused by SARS-CoV-2 (severe acute respiratory syndrome coronavirus 2)                        | 1240521000000100   |
| Post-COVID-19 syndrome                                                                                                    | 1325161000000100   |
| Acute kidney injury due to disease caused by SARS-CoV-2 (severe acute respiratory syndrome coronavirus 2)                 | 870589006          |
| Acute bronchitis caused by SARS-CoV-2 (severe acute respiratory syndrome coronavirus 2)                                   | 138389411000119000 |
| Possible COVID-19                                                                                                         | 840544004          |

Supplementary Table 13: List of symptoms outcomes considered

| Domain               | Symptom                         | Component of the primary outcome: WHO case definition for Long COVID | Component of the secondary outcome: significantly reported higher among patients with COVID-19 |
|----------------------|---------------------------------|----------------------------------------------------------------------|------------------------------------------------------------------------------------------------|
| Breathing            | Orthopnoea                      |                                                                      |                                                                                                |
|                      | Paroxysmal nocturnal dyspnoea   |                                                                      |                                                                                                |
|                      | Shortness of breath             | X                                                                    | X                                                                                              |
|                      | Shortness of breath at rest     |                                                                      | X                                                                                              |
|                      | Shortness of breath on exertion |                                                                      | X                                                                                              |
|                      | Tachypnoea                      |                                                                      |                                                                                                |
|                      | Wheezing                        |                                                                      | X                                                                                              |
| Pain                 | Chest pain                      | X                                                                    | X                                                                                              |
|                      | Neuropathic pain                |                                                                      |                                                                                                |
|                      | Pain                            |                                                                      | X                                                                                              |
|                      | Pleuritic chest pain            |                                                                      | X                                                                                              |
| Circulation          | Cold extremities                |                                                                      |                                                                                                |
|                      | Limb swelling                   |                                                                      | X                                                                                              |
|                      | Orthostatic hypotension         |                                                                      |                                                                                                |
|                      | Palpitations                    | X                                                                    | X                                                                                              |
|                      | Presyncope                      |                                                                      |                                                                                                |
|                      | Tachycardia                     |                                                                      | X                                                                                              |
| Fatigue              | Fatigue                         | X                                                                    | X                                                                                              |
|                      | Post exertional fatigue         | X                                                                    |                                                                                                |
| Cognitive health     | Amnesia                         | X                                                                    |                                                                                                |
|                      | Brain fog                       | X                                                                    | X                                                                                              |
|                      | Difficulty understanding        |                                                                      |                                                                                                |
|                      | Dysarthria                      |                                                                      |                                                                                                |
|                      | Dysphasia                       |                                                                      |                                                                                                |
|                      | Reading difficulty              |                                                                      |                                                                                                |
| Movement             | Apraxia                         |                                                                      |                                                                                                |
|                      | Balance difficulty              |                                                                      |                                                                                                |
|                      | Tremors                         |                                                                      |                                                                                                |
| Sleep                | Excessive sleep                 | X                                                                    |                                                                                                |
|                      | Insomnia                        | X                                                                    | X                                                                                              |
| Ear, nose and throat | Anosmia                         | X                                                                    | X                                                                                              |
|                      | Cough                           | X                                                                    | X                                                                                              |
|                      | Dysgeusia                       | X                                                                    |                                                                                                |
|                      | Dysphagia                       |                                                                      | X                                                                                              |
|                      | Ear pain                        |                                                                      | X                                                                                              |
|                      | Hearing loss                    | X                                                                    |                                                                                                |
|                      | Hoarse voice                    |                                                                      | X                                                                                              |
|                      | Hyperacusis                     | X                                                                    |                                                                                                |
|                      | Nasal congestion                |                                                                      | X                                                                                              |
|                      | Phlegm                          |                                                                      | X                                                                                              |

|                              |                                |          |   |
|------------------------------|--------------------------------|----------|---|
|                              | Sneezing                       |          | X |
|                              | Sore throat                    |          |   |
|                              | Tinnitus                       |          |   |
| <b>Stomach and digestion</b> | Abdominal pain                 | X        | X |
|                              | Bloating                       |          | X |
|                              | Bowel incontinence             |          | X |
|                              | Constipation                   | X        | X |
|                              | Diarrhoea                      | X        | X |
|                              | Gastric reflux                 | X        |   |
|                              | gastritis                      | X        | X |
|                              | Nausea                         |          | X |
|                              | Vomiting                       |          | X |
|                              | Weight gain                    |          |   |
|                              | Weight loss                    |          | X |
|                              | <b>Muscles and joints</b>      | Asthenia |   |
| Joint pain                   |                                | X        | X |
| Joint stiffness              |                                |          |   |
| Muscle cramping              |                                | X        |   |
| Muscle pain                  |                                | X        |   |
| Muscle twitch                |                                |          |   |
| Paraesthesia                 |                                | X        | X |
| <b>Mental health</b>         | Anhedonia                      |          | X |
|                              | Anorexia                       |          | X |
|                              | Anxiety                        |          | X |
|                              | Anxiety and depression         | X        |   |
|                              | Depression                     | X        | X |
|                              | Increased appetite             |          |   |
|                              | loneliness                     |          |   |
|                              | Mood swings                    |          |   |
|                              | Post-traumatic stress disorder |          |   |
| <b>Hair, skin and nails</b>  | Dry and scaly skin             |          | X |
|                              | Hair loss                      |          | X |
|                              | Hives                          |          |   |
|                              | Itchy skin                     |          | X |
|                              | Nail changes                   |          | X |
|                              | Purpura                        |          |   |
|                              | Rash                           |          | X |
| <b>Eyes</b>                  | Diplopia                       | X        |   |
|                              | Dry eye                        |          | X |
|                              | Eye pain                       |          |   |
|                              | Flashing lights and floaters   |          |   |
|                              | Itchy eyes                     |          |   |
|                              | Photophobia                    |          |   |
|                              | Red eye                        |          | X |
|                              | Watery eyes                    |          |   |
|                              | Ejaculation difficulty         |          | X |

|                            |                         |   |   |
|----------------------------|-------------------------|---|---|
| <b>Reproductive health</b> | Erectile dysfunction    |   | X |
|                            | Menorrhagia             | X | X |
|                            | Menstrual changes       | X |   |
|                            | Premenstrual syndrome   | X |   |
|                            | Vaginal discharge       |   | X |
|                            | Vaginal dryness         |   |   |
|                            | Anorgasm                |   |   |
|                            | Reduced libido          |   | X |
| <b>Other symptoms</b>      | Allergies               | X | X |
|                            | Angioedema              |   |   |
|                            | Body ache               |   | X |
|                            | Chills and shivering    |   |   |
|                            | Dizziness               | X | X |
|                            | Dry mouth               |   | X |
|                            | Fever                   | X | X |
|                            | Haemoptysis             |   | X |
|                            | Hallucinations          |   |   |
|                            | Headache                | X | X |
|                            | Hot flushes             |   | X |
|                            | Mouth ulcer             |   | X |
|                            | Neurasthenia            |   |   |
|                            | Polydipsia              |   |   |
|                            | Polyuria                |   | X |
|                            | Seizures                |   |   |
|                            | Sweating                |   |   |
|                            | Swelling of lymph nodes |   |   |
|                            | Urinary incontinence    |   | X |
|                            | Urinary retention       |   | X |
| Vertigo                    |                         | X |   |
